# Supplementary material for: Functionalized Tris(anilido)triazacyclononanes as Hexadentate Ligands for the Encapsulation of U(III), U(IV) and La(III) Cations
Source: MDPI journal article supplement (doi:10.3390/inorganics9120086), 2021-11-28
Supplement: s1 [file s1]

**Functionalized tris(anilido)triazacyclononanes as hexadentate ligands for the encapsulation of U(III), U(IV) and La(III) cations**

Alasdair Formanuik<sup>1</sup>, Fabrizio Ortu<sup>1,2</sup>, Iñigo. J. Vitorica-Yrezabal<sup>1</sup>, Floriana Tuna<sup>1</sup>, Eric J. L. McInnes<sup>1</sup>, Louise S. Natrajan<sup>1,\*</sup> and David P. Mills<sup>1,\*</sup>

<sup>1</sup> Department of Chemistry; The University of Manchester, Oxford Road, Manchester, M13 9PL, U.K.

aformanuik@outlook.com (A.F.); inigo.vitorica@manchester.ac.uk (I.J.V.-Y.);

floriana.tuna@manchester.ac.uk (F.T.); eric.mcinnnes@manchester.ac.uk (E.J.L.M.).

<sup>2</sup> School of Chemistry, University of Leicester, University Road, Leicester, LE1 7RH, U.K.;

fabrizio.ortu@leicester.ac.uk.

\* Correspondence: louise.natrajan@manchester.ac.uk; david.mills@manchester.ac.uk; Tel.: +44-161-275-4606

**Contents**

|                                     |            |
|-------------------------------------|------------|
| <b>S1. Crystallographic details</b> | <b>S2</b>  |
| <b>S2. SQUID magnetometry</b>       | <b>S6</b>  |
| <b>S3. EPR spectroscopy</b>         | <b>S9</b>  |
| <b>S4. NMR spectroscopy</b>         | <b>S10</b> |

## S1. Crystallographic details

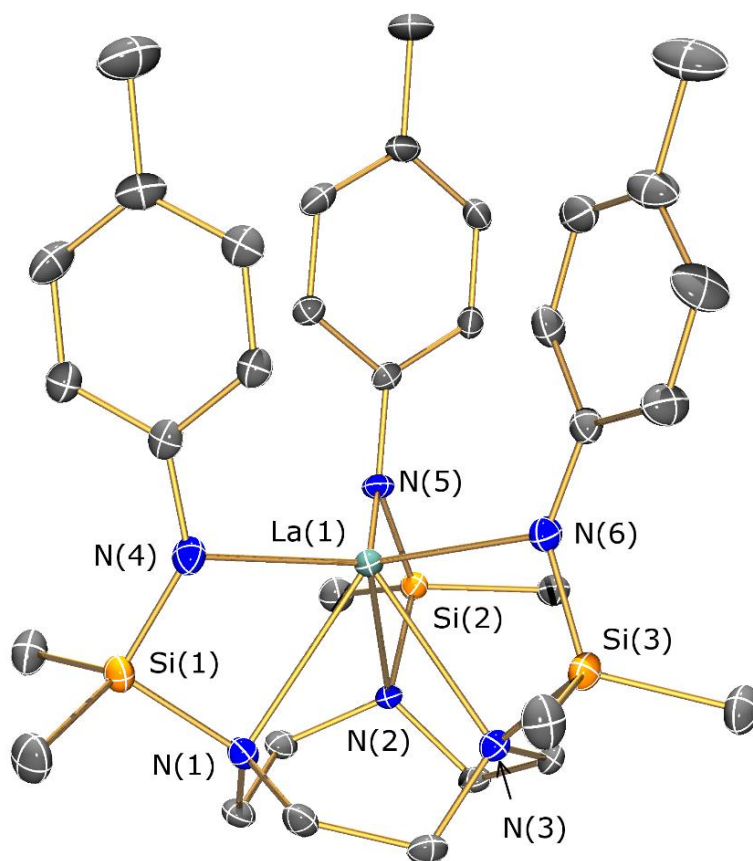

**Figure S1.** Molecular structure of  $[\text{La}\{\text{tacn}(\text{SiMe}_2\text{NC}_6\text{H}_4\text{Me-4})_3\}]$  (**3-La**·**0.5C<sub>7</sub>H<sub>8</sub>**) with selective atom labelling. Displacement ellipsoids set at 30% probability level and hydrogen atoms and lattice toluene omitted for clarity.

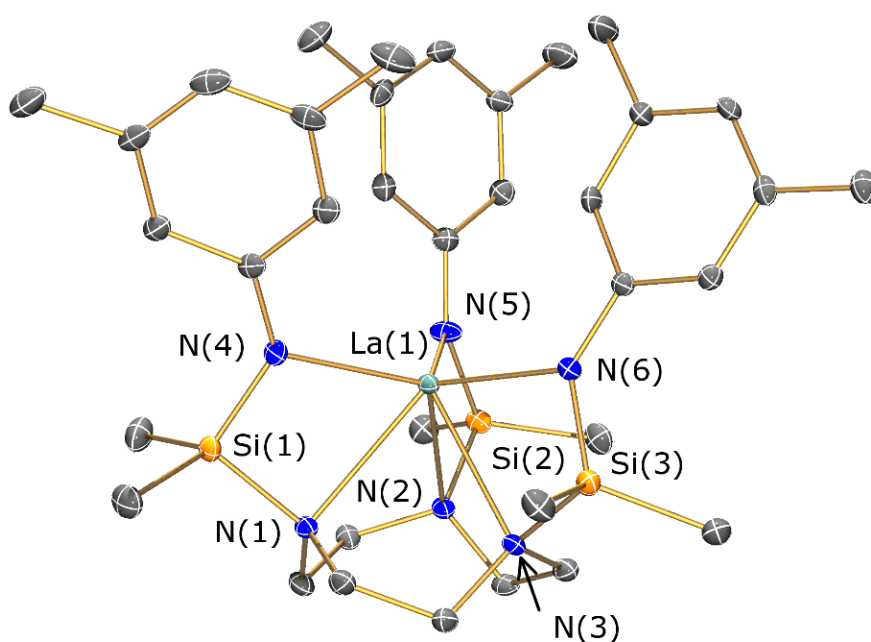

**Figure S2.** Molecular structure of  $[\text{La}\{\text{tacn}(\text{SiMe}_2\text{NC}_6\text{H}_3\text{Me}_2\text{-3,5})_3\}]$  (**4-La**) with selective atom labelling. Displacement ellipsoids set at 30% probability level and hydrogen atoms omitted for clarity.

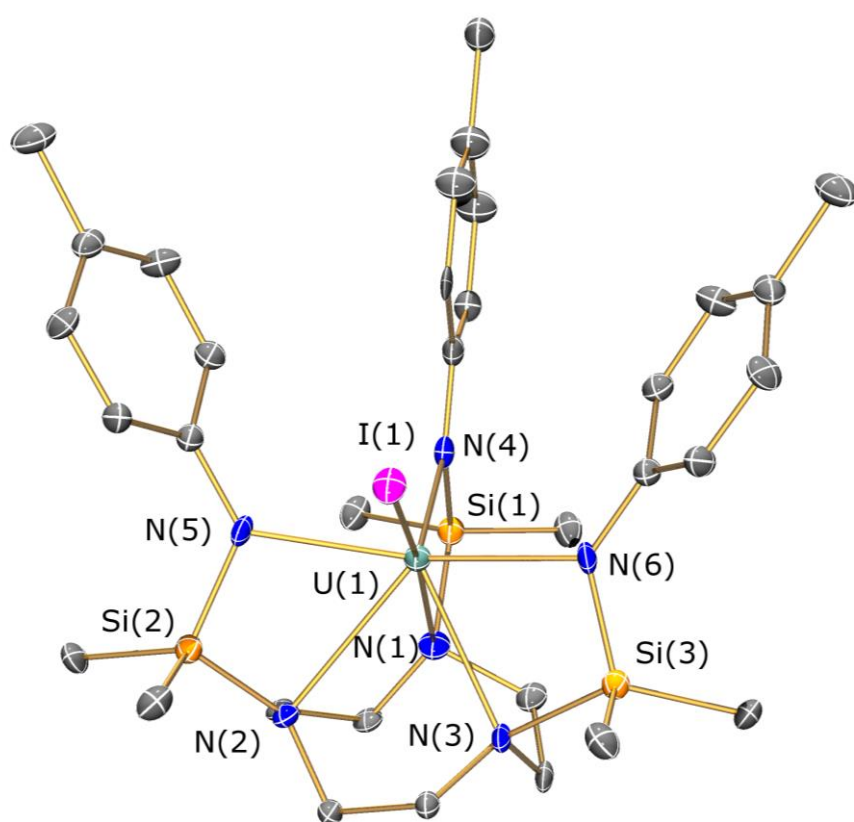

**Figure S3.** Molecular structure of  $[\text{U}\{\text{tacn}(\text{SiMe}_2\text{NC}_6\text{H}_4\text{Me-4})_3\}(\text{I})]$  (**5**) with selective atom labelling. Displacement ellipsoids set at 30% probability level and hydrogen atoms omitted for clarity.

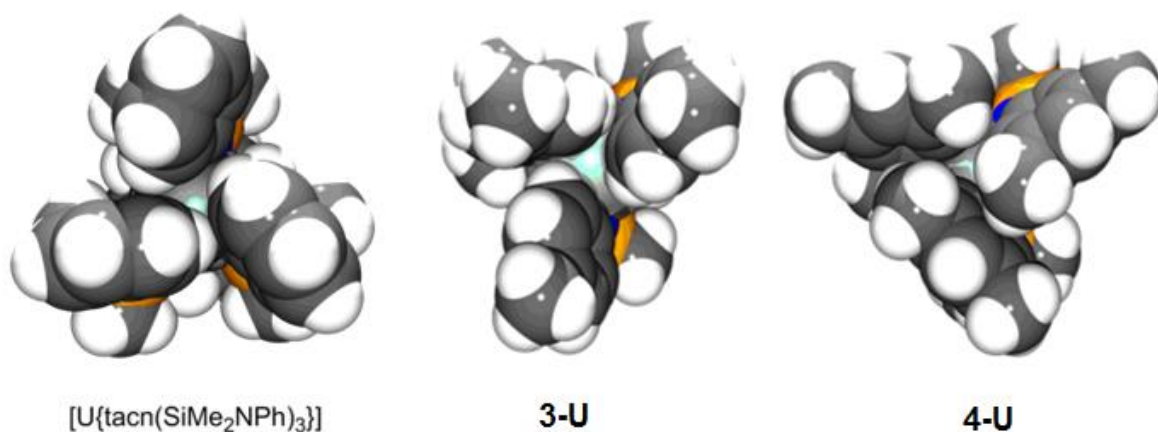

**Figure S4.** Space-filling representations of  $[\text{U}\{\text{tacn}(\text{SiMe}_2\text{NPh})_3\}]$ , **3-U** and **4-U** viewed along the approximate  $C_3$  axes above the  $N$ -aryl rings (U: cyan, C: grey, H: white, N: blue, Si: coral).

**Table S1.** Crystallographic data for **3-La·0.5C<sub>7</sub>H<sub>8</sub>**, **3-U·0.5C<sub>7</sub>H<sub>8</sub>**, **4-La** and **4-U**.

|                                                                                                         | <b>3-La·0.5C<sub>7</sub>H<sub>8</sub></b>                                        | <b>3-U·0.5C<sub>7</sub>H<sub>8</sub></b>                                        | <b>4-La</b>                                                      | <b>4-U</b>                                                      |
|---------------------------------------------------------------------------------------------------------|----------------------------------------------------------------------------------|---------------------------------------------------------------------------------|------------------------------------------------------------------|-----------------------------------------------------------------|
| Formula                                                                                                 | C <sub>73</sub> H <sub>110</sub> La <sub>2</sub> N <sub>12</sub> Si <sub>6</sub> | C <sub>73</sub> H <sub>110</sub> U <sub>2</sub> N <sub>12</sub> Si <sub>6</sub> | C <sub>36</sub> H <sub>57</sub> LaN <sub>6</sub> Si <sub>3</sub> | C <sub>36</sub> H <sub>57</sub> UN <sub>6</sub> Si <sub>3</sub> |
| Fw                                                                                                      | 1602.08                                                                          | 1800.32                                                                         | 797.05                                                           | 896.17                                                          |
| crystal size, mm                                                                                        | 0.06 x 0.10 x 0.13                                                               | 0.02 x 0.06 x 0.18                                                              | 0.09 x 0.15 x 0.23                                               | 0.04 x 0.12 x 0.13                                              |
| crystal colour, habit                                                                                   | colourless, block                                                                | red, block                                                                      | yellow, block                                                    | red, block                                                      |
| crystal system                                                                                          | triclinic                                                                        | triclinic                                                                       | monoclinic                                                       | monoclinic                                                      |
| space group                                                                                             | <i>P</i> −1                                                                      | <i>P</i> −1                                                                     | <i>P</i> 2 <sub>1</sub> / <i>n</i>                               | <i>P</i> 2 <sub>1</sub> / <i>n</i>                              |
| <i>a</i> , Å                                                                                            | 12.4192(4)                                                                       | 12.4091(6)                                                                      | 12.0915(3)                                                       | 12.0318(14)                                                     |
| <i>b</i> , Å                                                                                            | 18.3391(6)                                                                       | 18.2810(8)                                                                      | 16.1964(4)                                                       | 16.230(5)                                                       |
| <i>c</i> , Å                                                                                            | 18.7396(6)                                                                       | 18.8018(8)                                                                      | 20.9440(5)                                                       | 20.906(2)                                                       |
| <i>α</i> , °                                                                                            | 66.758(3)                                                                        | 66.874(4)                                                                       | 90                                                               | 90                                                              |
| <i>β</i> , °                                                                                            | 87.521(3)                                                                        | 87.407(4)                                                                       | 103.91(2)                                                        | 103.947(11)                                                     |
| <i>γ</i> , °                                                                                            | 87.639(3)                                                                        | 87.821(4)                                                                       | 90                                                               | 90                                                              |
| <i>V</i> , Å <sup>3</sup>                                                                               | 3916.7(2)                                                                        | 3917.5(3)                                                                       | 3981.5(2)                                                        | 3962.1(14)                                                      |
| <i>Z</i>                                                                                                | 2                                                                                | 2                                                                               | 4                                                                | 4                                                               |
| <i>ρ</i> <sub>calcd</sub> , g cm <sup>3</sup>                                                           | 0.597                                                                            | 0.724                                                                           | 1.234                                                            | 1.406                                                           |
| <i>μ</i> , mm <sup>−1</sup>                                                                             | 1.215                                                                            | 4.268                                                                           | 1.195                                                            | 4.220                                                           |
| <i>F</i> (000)                                                                                          | 678                                                                              | 850                                                                             | 1428                                                             | 1568                                                            |
| no. of reflections (unique)                                                                             | 21879 (14193)                                                                    | 22195 (14209)                                                                   | 16679 (7288)                                                     | 12818 (7216)                                                    |
| <i>S</i> <sup>a</sup>                                                                                   | 1.02                                                                             | 1.02                                                                            | 1.04                                                             | 0.89                                                            |
| <i>R</i> <sub>1</sub> ( <i>wR</i> <sub>2</sub> ) ( <i>F</i> <sup>2</sup> > 2σ( <i>F</i> <sup>2</sup> )) | 0.0337(0.0679)                                                                   | 0.0655(0.1041)                                                                  | 0.0345(0.0714)                                                   | 0.0868(0.1804)                                                  |
| no. of parameters (restraints)                                                                          | 857 (0)                                                                          | 857 (927)                                                                       | 427 (0)                                                          | 427 (456)                                                       |
| <i>R</i> <sub>int</sub>                                                                                 | 0.025                                                                            | 0.067                                                                           | 0.034                                                            | 0.179                                                           |
| min./max. diff map, Å <sup>−3</sup>                                                                     | −0.34, 0.38                                                                      | −1.69, 1.51                                                                     | −0.44, 0.42                                                      | −3.90, 3.89                                                     |

<sup>a</sup> Conventional  $R = \Sigma||F_o| - |F_c||/\Sigma|F_o|$ ;  $R_w = [\Sigma w(F_o^2 - F_c^2)^2/\Sigma w(F_o^2)^2]^{1/2}$ ;  $S = [\Sigma w(F_o^2 - F_c^2)^2/\text{no. data} - \text{no. params}]^{1/2}$  for all data.

**Table S2.** Crystallographic data for **5**, **6·THF** and **7**.

|                                                                                                         | <b>5</b>                                                          | <b>6·THF</b>                                                        | <b>7</b>                                                                                        |
|---------------------------------------------------------------------------------------------------------|-------------------------------------------------------------------|---------------------------------------------------------------------|-------------------------------------------------------------------------------------------------|
| Formula                                                                                                 | C <sub>33</sub> H <sub>51</sub> IN <sub>6</sub> Si <sub>3</sub> U | C <sub>37</sub> H <sub>59</sub> ClON <sub>6</sub> Si <sub>3</sub> U | C <sub>96</sub> H <sub>130</sub> Cl <sub>2</sub> N <sub>12</sub> Si <sub>6</sub> U <sub>2</sub> |
| Fw                                                                                                      | 980.99                                                            | 961.65                                                              | 2047.51                                                                                         |
| crystal size, mm                                                                                        | 0.08 x 0.09 x 0.14                                                | 0.04 x 0.11 x 0.14                                                  | 0.07 x 0.11 x 0.14                                                                              |
| crystal colour, habit                                                                                   | red, block                                                        | red, block                                                          | red, block                                                                                      |
| crystal system                                                                                          | orthorhombic                                                      | monoclinic                                                          | orthorhombic                                                                                    |
| space group                                                                                             | <i>Pmn</i> 2 <sub>1</sub>                                         | <i>P</i> 2 <sub>1</sub> / <i>c</i>                                  | <i>Pnma</i>                                                                                     |
| <i>a</i> , Å                                                                                            | 16.7641(15)                                                       | 22.2114(9)                                                          | 18.0078(9)                                                                                      |
| <i>b</i> , Å                                                                                            | 9.1477(7)                                                         | 8.8187(4)                                                           | 15.5612(12)                                                                                     |
| <i>c</i> , Å                                                                                            | 11.9248(11)                                                       | 21.0934(9)                                                          | 17.8903(8)                                                                                      |
| $\alpha$ , °                                                                                            | 90                                                                | 90                                                                  | 90                                                                                              |
| $\beta$ , °                                                                                             | 90                                                                | 90.495(4)                                                           | 90                                                                                              |
| $\gamma$ , °                                                                                            | 90                                                                | 90                                                                  | 90                                                                                              |
| <i>V</i> , Å <sup>3</sup>                                                                               | 1828.7(3)                                                         | 4131.5(3)                                                           | 5013.3(5)                                                                                       |
| <i>Z</i>                                                                                                | 2                                                                 | 4                                                                   | 2                                                                                               |
| $\rho_{\text{calcd}}$ , g cm <sup>3</sup>                                                               | 1.688                                                             | 1.347                                                               | 1.234                                                                                           |
| $\mu$ , mm <sup>−1</sup>                                                                                | 5.412                                                             | 4.117                                                               | 3.396                                                                                           |
| <i>F</i> (000)                                                                                          | 854                                                               | 1564                                                                | 1864                                                                                            |
| no. of reflections (unique)                                                                             | 4423 (2428)                                                       | 12833 (7543)                                                        | 11015 (4729)                                                                                    |
| <i>S</i> <sup>a</sup>                                                                                   | 1.07                                                              | 1.02                                                                | 1.02                                                                                            |
| <i>R</i> <sub>1</sub> ( <i>wR</i> <sub>2</sub> ) ( <i>F</i> <sup>2</sup> > 2σ( <i>F</i> <sup>2</sup> )) | 0.0520(0.1322)                                                    | 0.0649(0.1325)                                                      | 0.0423 (0.0953)                                                                                 |
| no. of parameters (restraints)                                                                          | 258 (391)                                                         | 470 (863)                                                           | 350 (501)                                                                                       |
| <i>R</i> <sub>int</sub>                                                                                 | 0.051                                                             | 0.093                                                               | 0.048                                                                                           |
| min./max. diff map, Å <sup>−3</sup>                                                                     | −1.97, 2.13                                                       | −2.47, 2.46                                                         | −0.98, 1.15                                                                                     |

<sup>a</sup> Conventional  $R = \Sigma||F_o| - |F_c||/\Sigma|F_o|$ ;  $R_w = [\Sigma w(F_o^2 - F_c^2)^2/\Sigma w(F_o^2)^2]^{1/2}$ ;  $S = [\Sigma w(F_o^2 - F_c^2)^2/\text{no. data} - \text{no. params}]^{1/2}$  for all data.



## S2. SQUID magnetometry

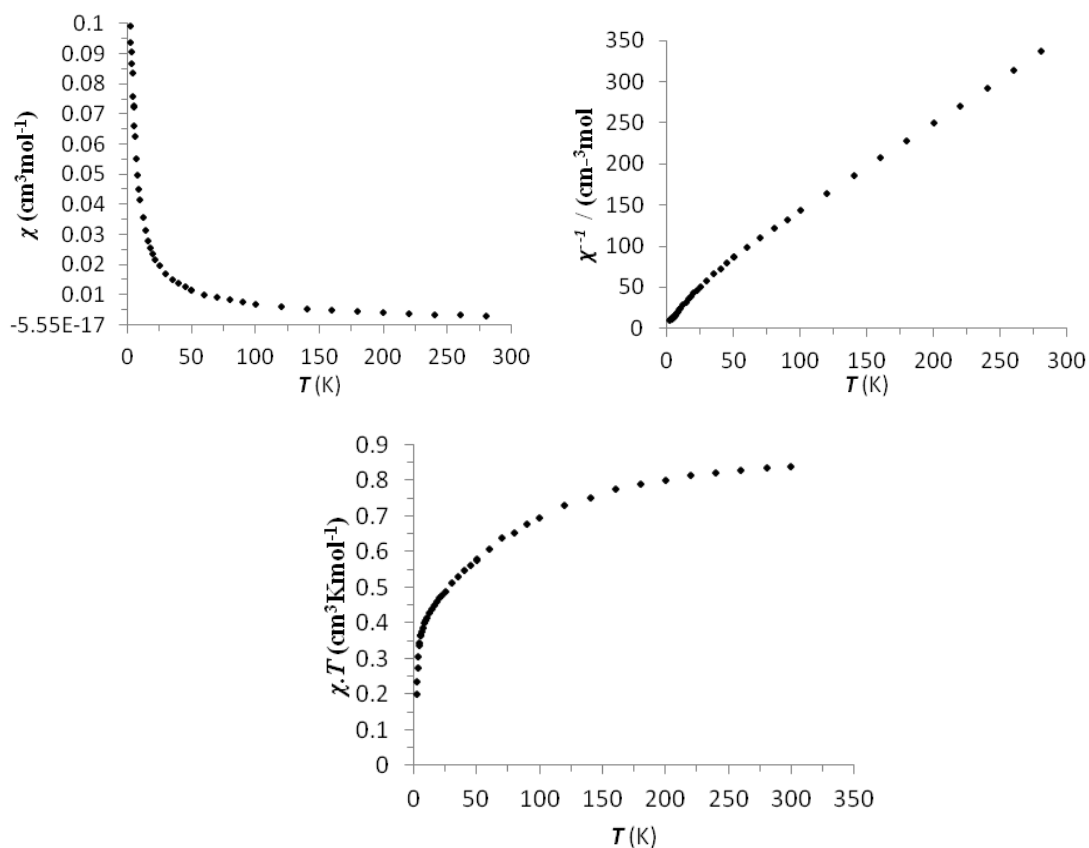

**Figure S5.** Magnetic measurements of **3-U**: (top left) Temperature dependence of susceptibility ( $\chi$ ); (top right) Temperature dependence of reciprocal susceptibility ( $\chi'$ ); (bottom) Temperature dependence of  $\chi T$  in a 5 kG applied field.

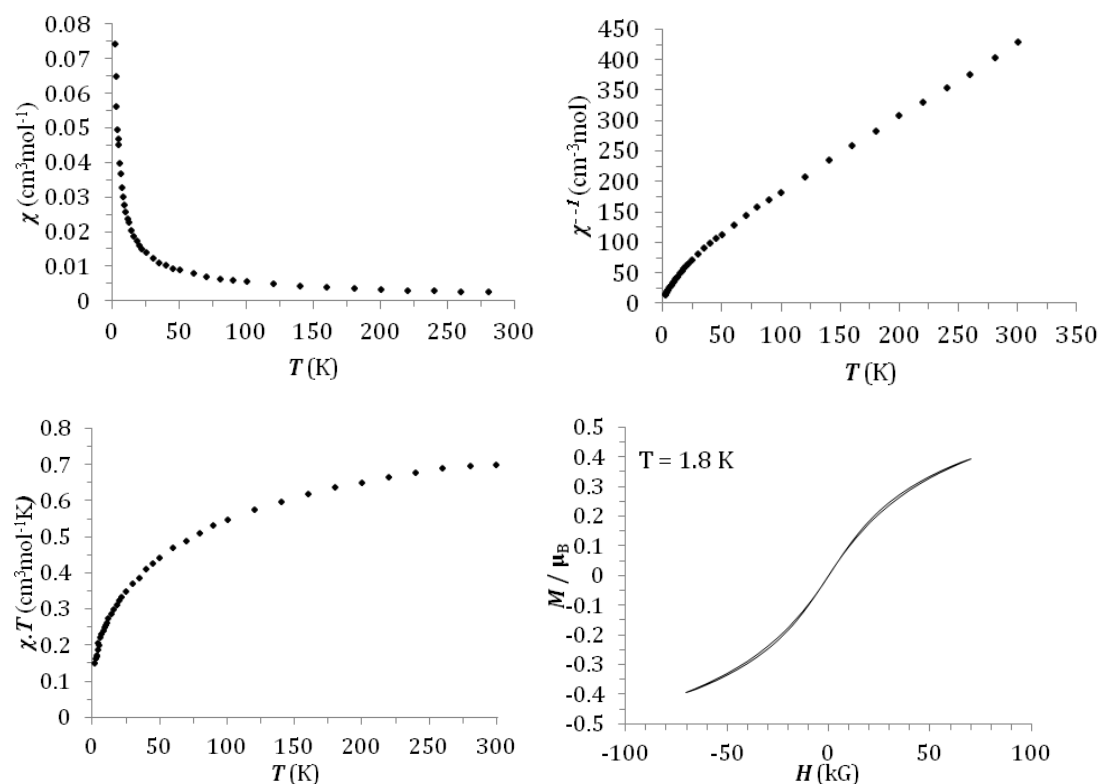

**Figure S6.** Magnetic measurements of **4-U**: (top left) Temperature dependence of susceptibility ( $\chi$ ); (top right) Temperature dependence of reciprocal susceptibility ( $\chi'$ ); (bottom left) Temperature dependence of  $\chi T$  in a 5 kG applied field; (bottom right) Magnetisation hysteresis at 1.8 K, sweep rate  $13 \text{ G s}^{-1}$ .

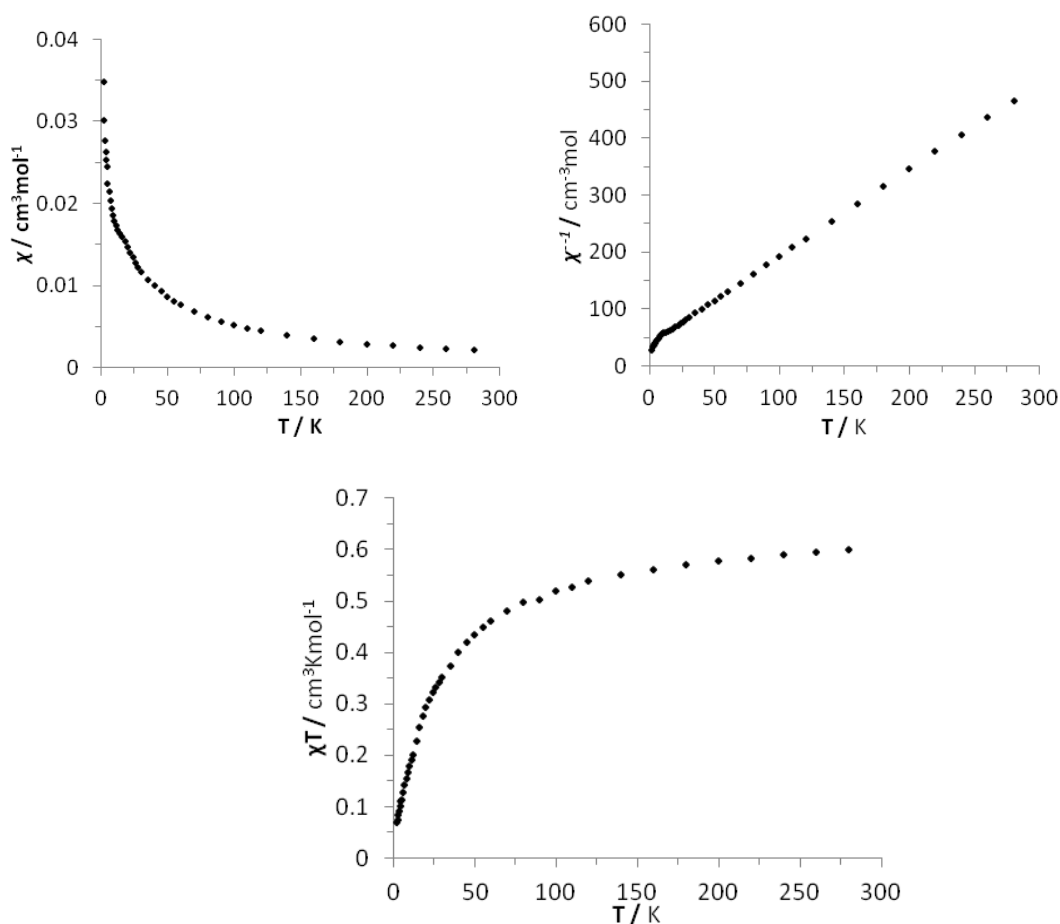

**Figure S7.** Magnetic measurements of **6**: (top left) Temperature dependence of susceptibility ( $\chi$ ); (top right) Temperature dependence of reciprocal susceptibility ( $\chi'$ ); (bottom) Temperature dependence of  $\chi T$  in a 5 kG applied field.

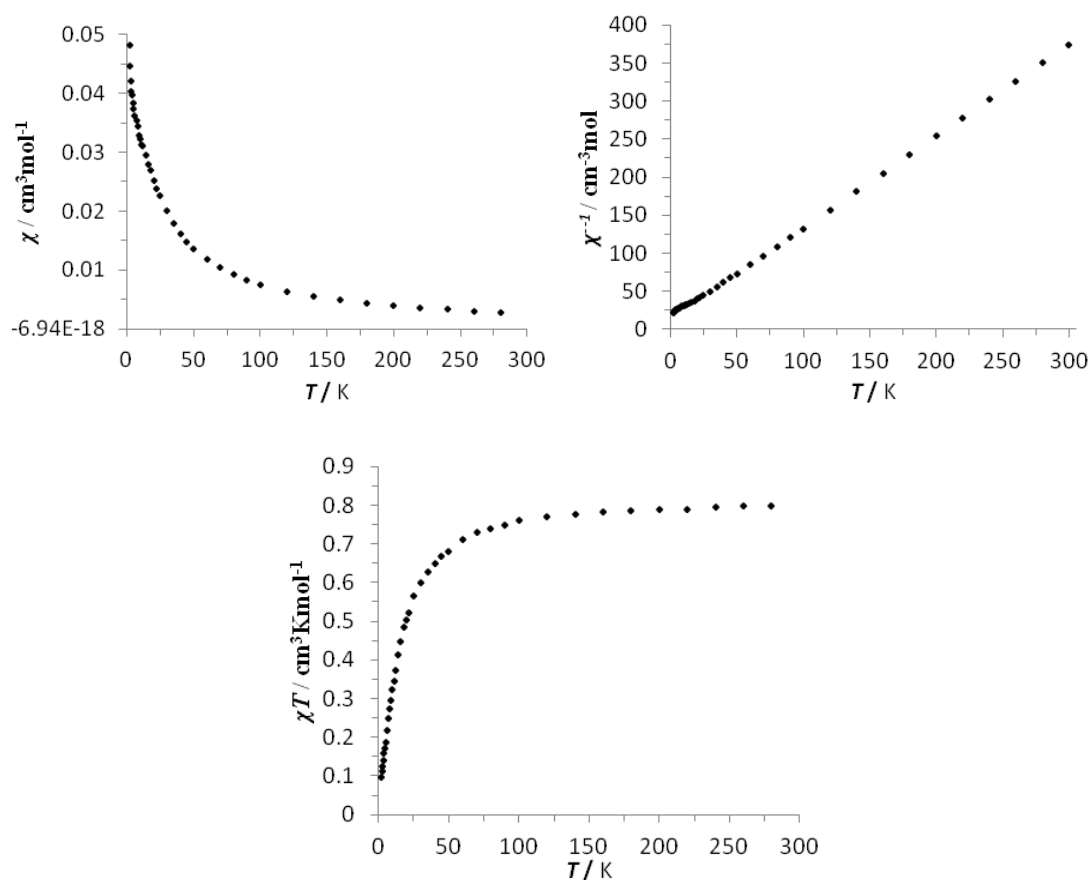

**Figure S8.** Magnetic measurements of **7**: (top left) Temperature dependence of susceptibility ( $\chi$ ); (top right) Temperature dependence of reciprocal susceptibility ( $\chi'$ ); (bottom) Temperature dependence of  $\chi T$  in a 5 kG applied field.



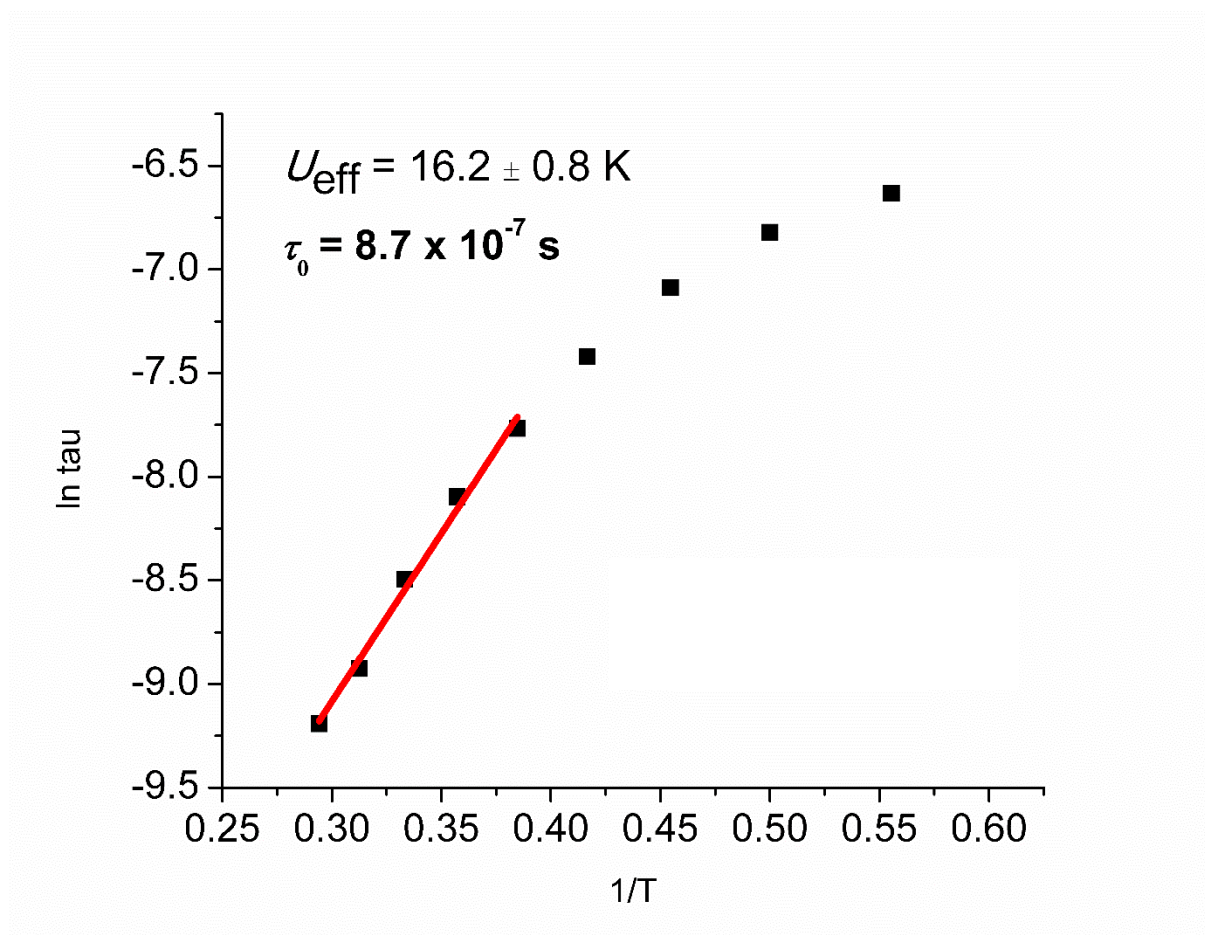

**Figure S9.** Arrhenius plot of **4-U**: (top left) Temperature dependence of susceptibility ( $\chi$ ); (top right) Temperature dependence of reciprocal susceptibility ( $\chi'$ ); (bottom) Temperature dependence of  $\chi T$  in a 5 kG applied field.

### S3. EPR spectroscopy

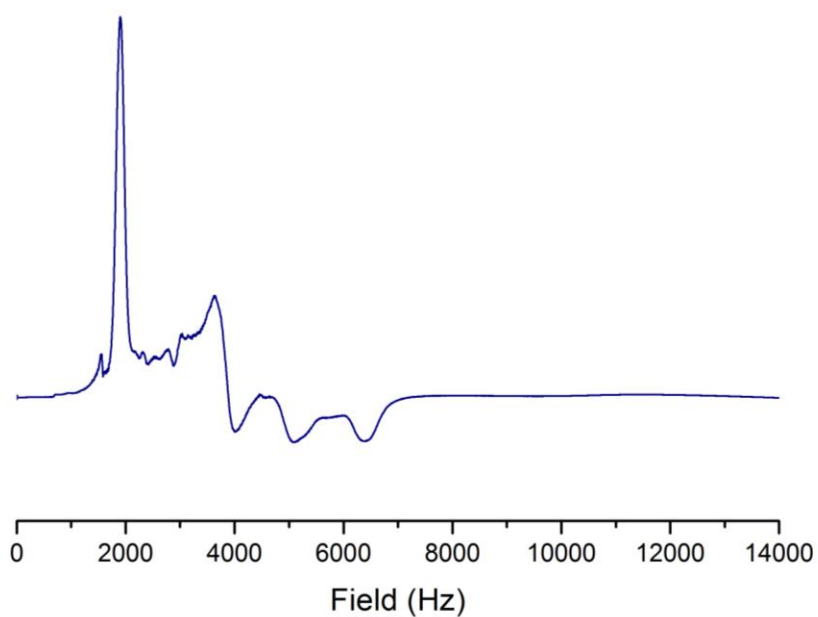

**Figure S10.** Powder X-band EPR spectra of **3-U** at 5 K.

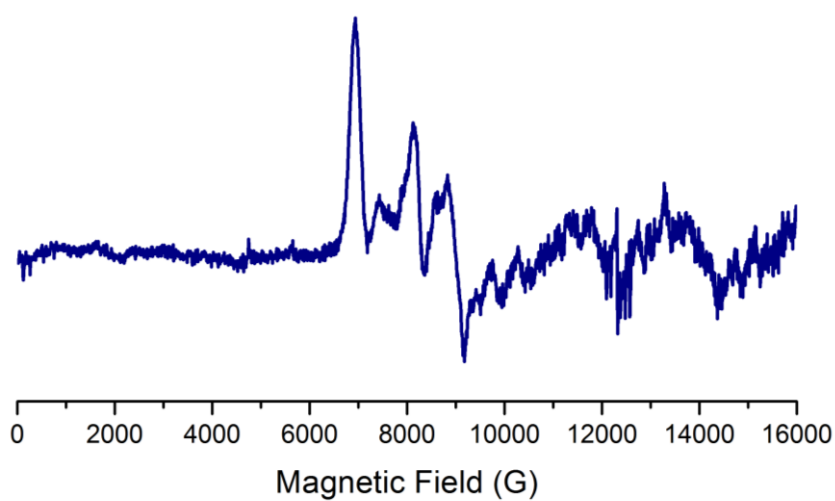

**Figure S11.** Powder Q-band EPR spectrum of **3-U** at 5 K.

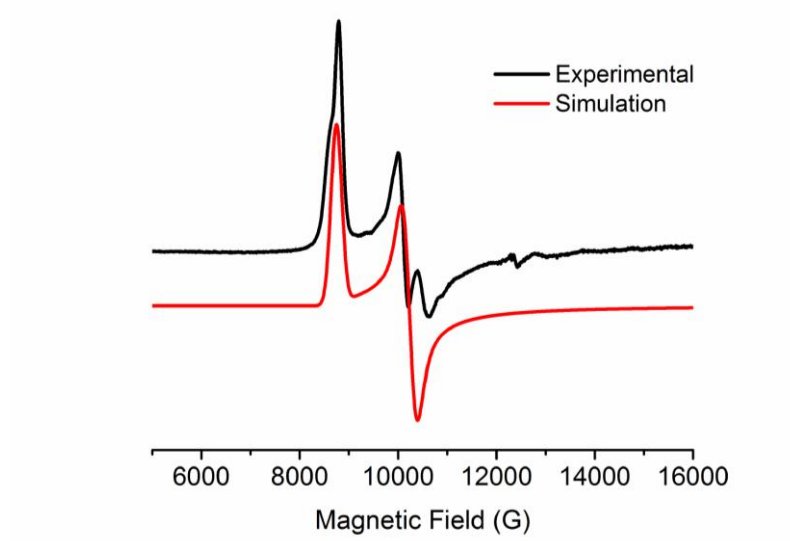

**Figure S12.** (black) Powder Q-band EPR spectrum of **4-U** at 5 K, and (red) its simulation with  $g_{\text{eff}} = 2.80, 2.37, 1.17$  (the latter component is not observed at this m.w. frequency but was fixed based on X-band data).

## S4. NMR spectroscopy

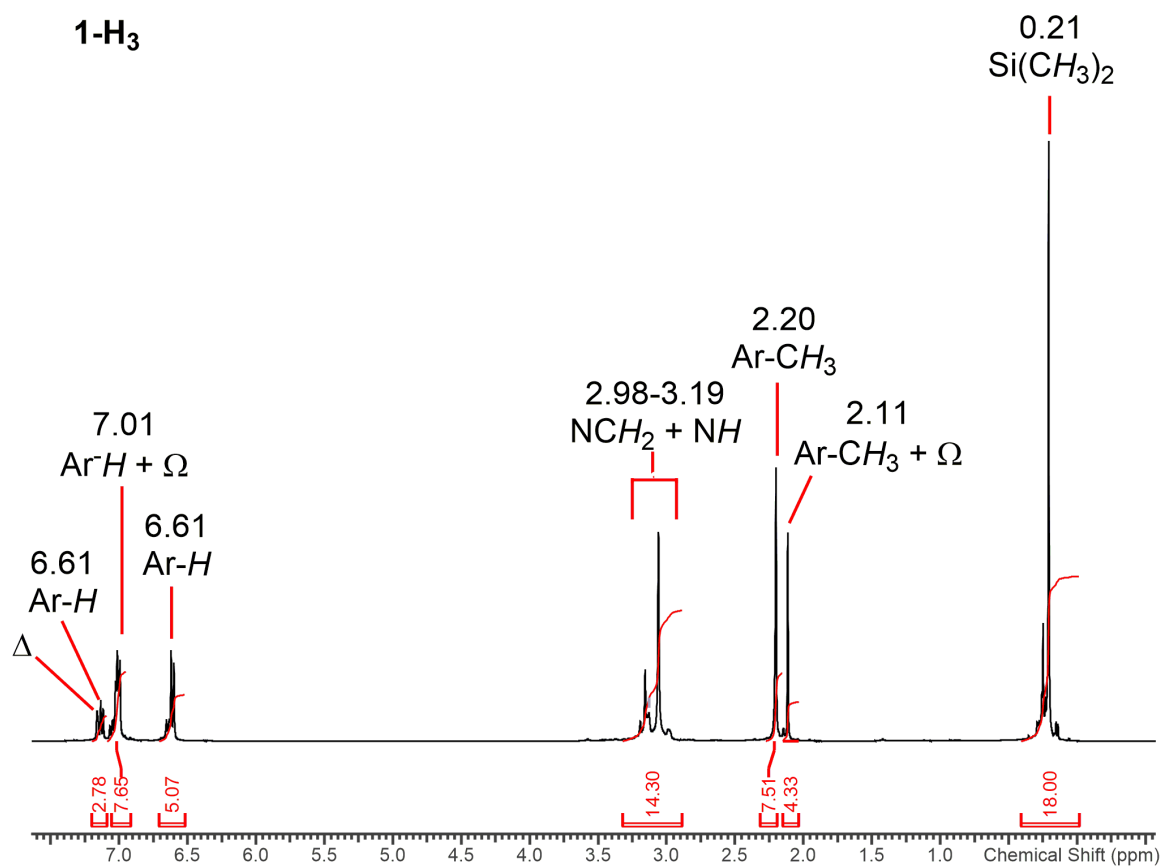

**Figure S13.**  $^1\text{H}$  NMR spectrum of **1-H<sub>3</sub>** in  $\text{C}_6\text{D}_6$ .  $\Delta$  denotes  $\text{C}_6\text{H}_6$  and  $\Omega$  denotes residual  $\text{C}_7\text{H}_8$ .

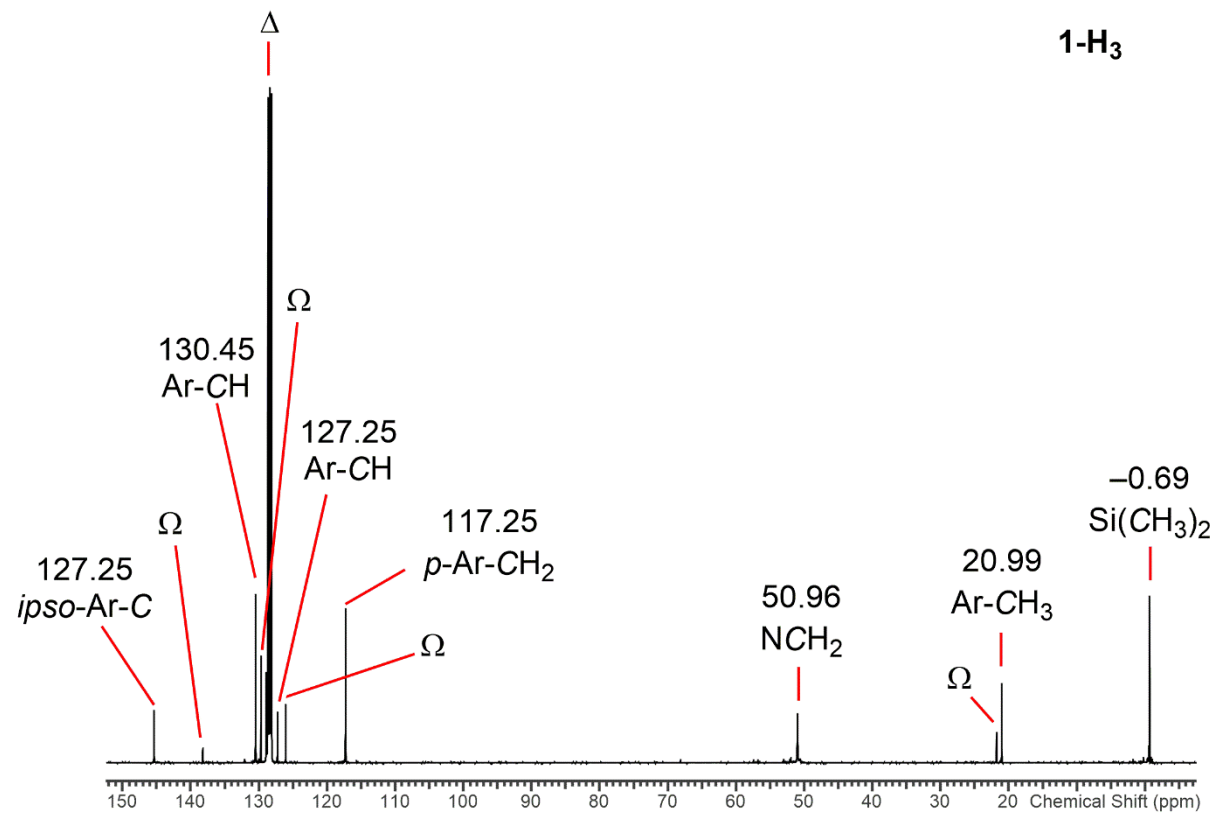

**Figure S14.**  $^{13}\text{C}\{^1\text{H}\}$  NMR spectrum of **1-H<sub>3</sub>** in  $\text{C}_6\text{D}_6$ .  $\Delta$  denotes  $\text{C}_6\text{H}_6$  and  $\Omega$  denotes residual  $\text{C}_7\text{H}_8$ .

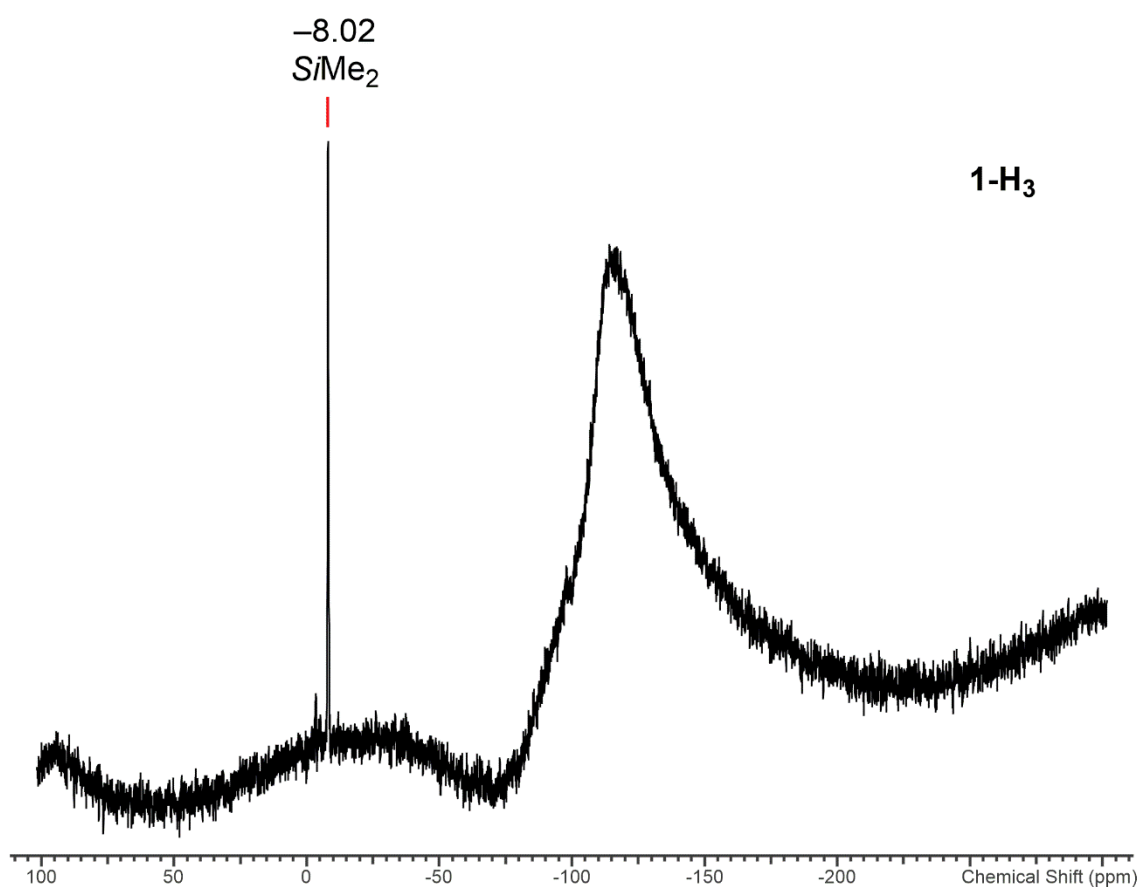

**Figure S15.**  $^{29}\text{Si}\{^1\text{H}\}$  NMR spectrum of **1-H<sub>3</sub>** in  $\text{C}_6\text{D}_6$ .

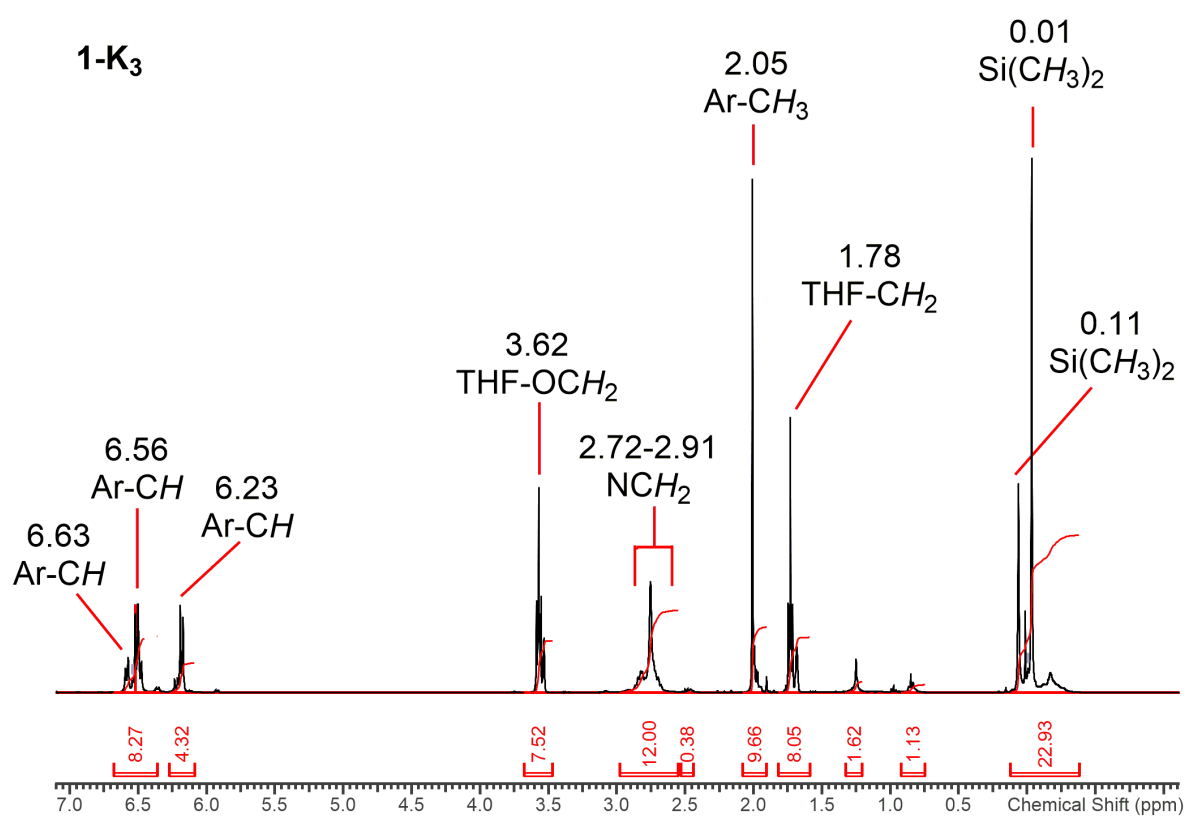

**Figure S16.**  $^1\text{H}$  NMR spectrum of **1-K<sub>3</sub>** in  $\text{C}_4\text{D}_8\text{O}$ .

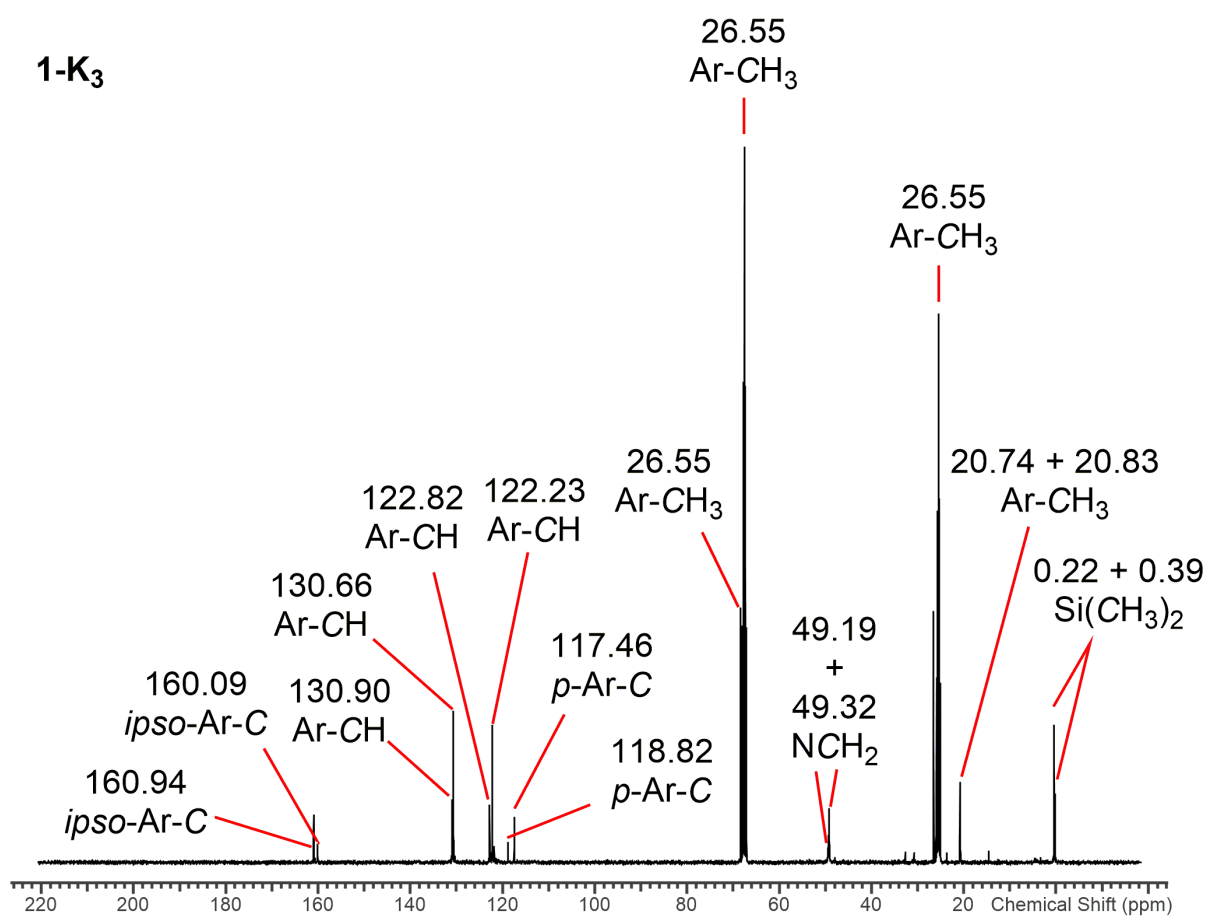

**Figure S17.**  $^{13}\text{C}\{^1\text{H}\}$  NMR spectrum of **1-K<sub>3</sub>** in C<sub>4</sub>D<sub>8</sub>O.

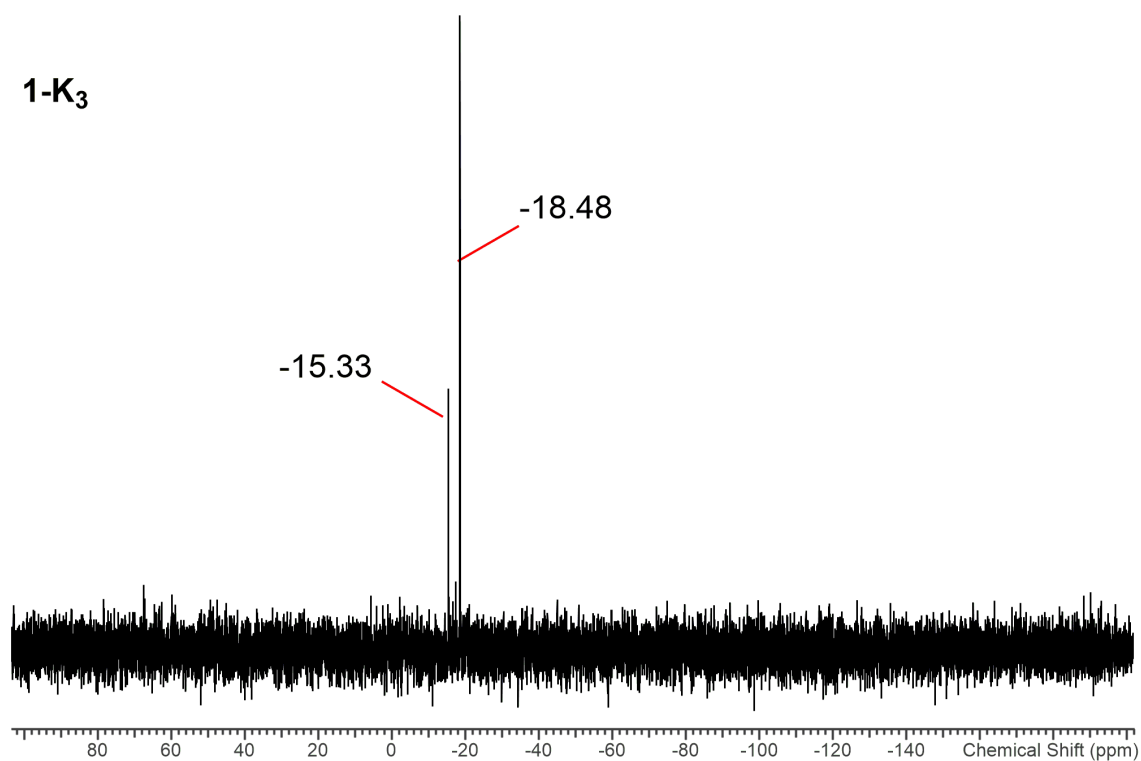

**Figure S18.**  $^{29}\text{Si}$  DEPT NMR spectrum of **1-K<sub>3</sub>** in C<sub>4</sub>D<sub>8</sub>O.

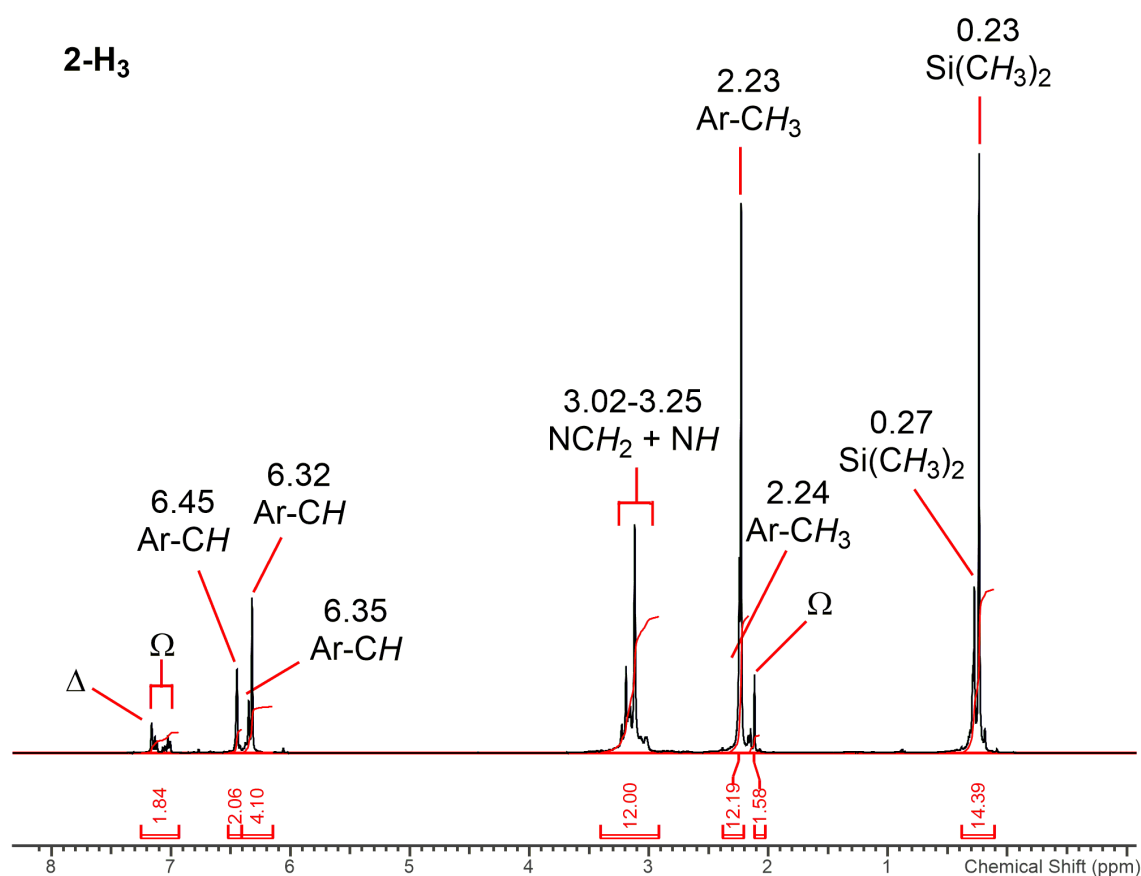

**Figure S19.** <sup>1</sup>H NMR spectrum of **2-H<sub>3</sub>** in C<sub>6</sub>D<sub>6</sub>.  $\Delta$  denotes C<sub>6</sub>H<sub>6</sub> and  $\Omega$  denotes residual C<sub>7</sub>H<sub>8</sub>.

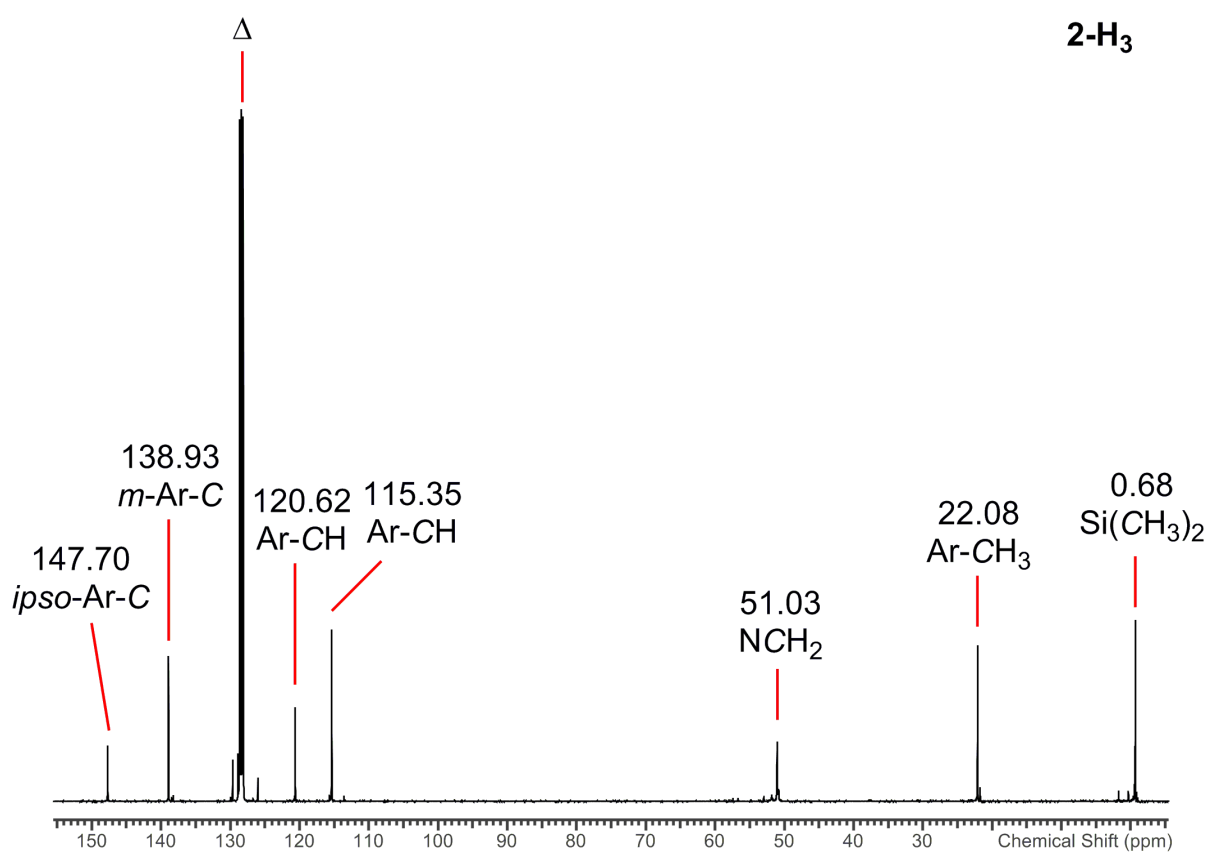

**Figure S20.** <sup>13</sup>C{<sup>1</sup>H} NMR spectrum of **2-H<sub>3</sub>** in C<sub>6</sub>D<sub>6</sub>.  $\Delta$  denotes residual C<sub>6</sub>H<sub>6</sub>.

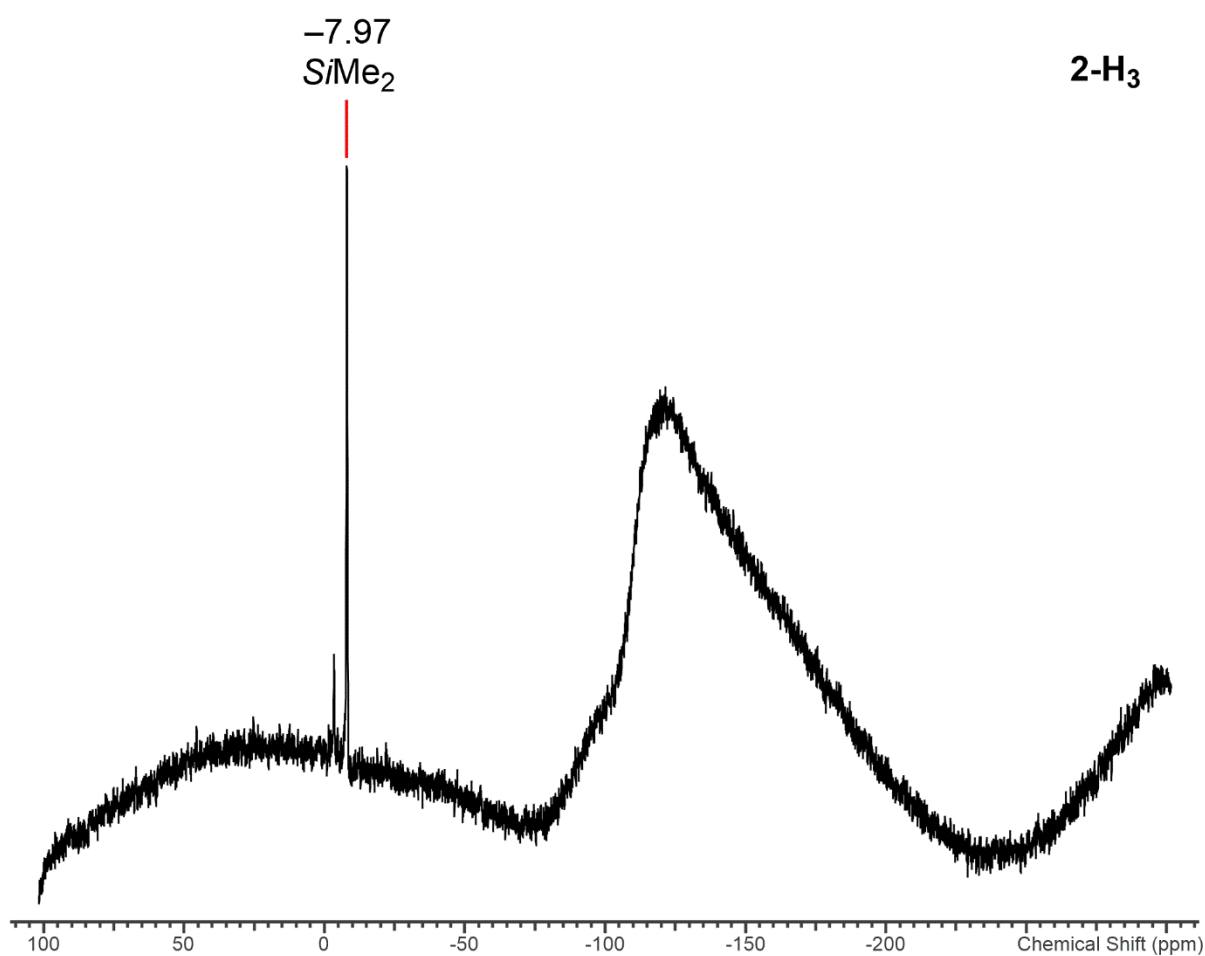

**Figure S21.**  $^{29}\text{Si}\{^1\text{H}\}$  NMR spectrum of **2-H<sub>3</sub>** in  $\text{C}_6\text{D}_6$ .

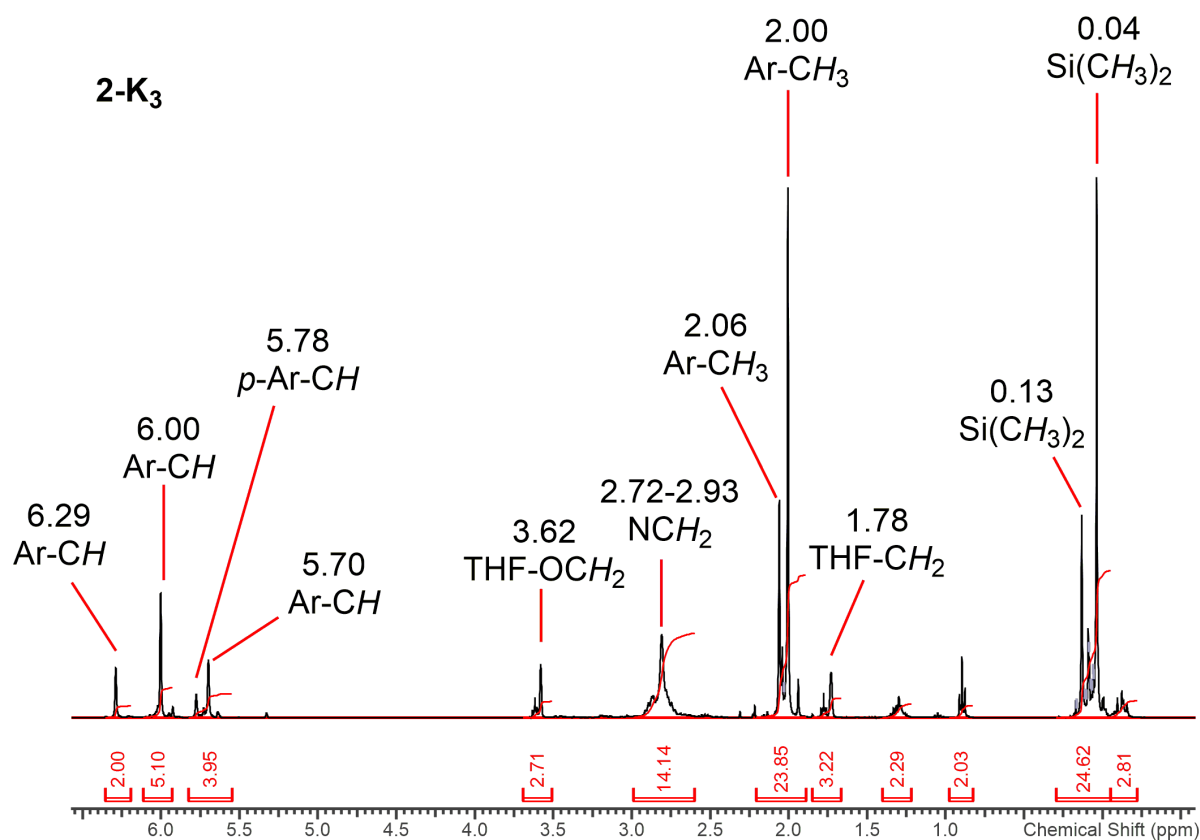

**Figure S22.**  $^1\text{H}$  NMR spectrum of **2-K<sub>3</sub>** in  $\text{C}_4\text{D}_8\text{O}$ .

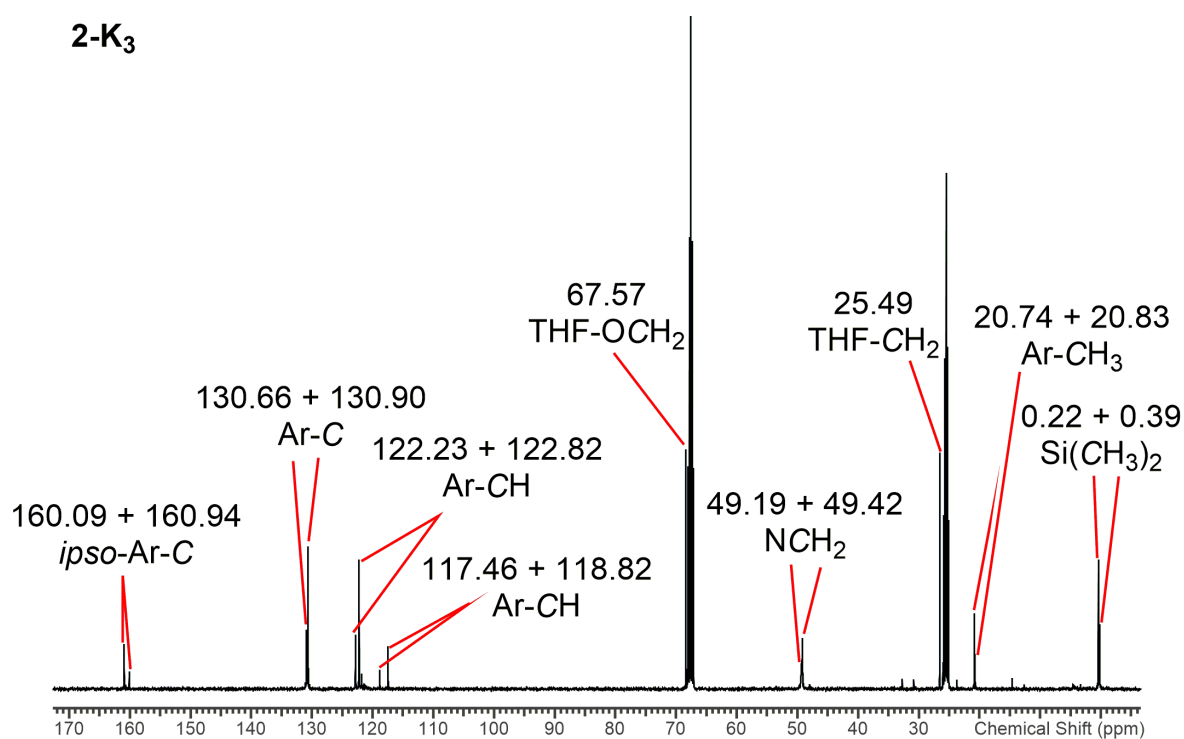

**Figure S23.**  $^{13}\text{C}\{^1\text{H}\}$  NMR spectrum of **2-K<sub>3</sub>** in  $\text{C}_4\text{D}_8\text{O}$ .

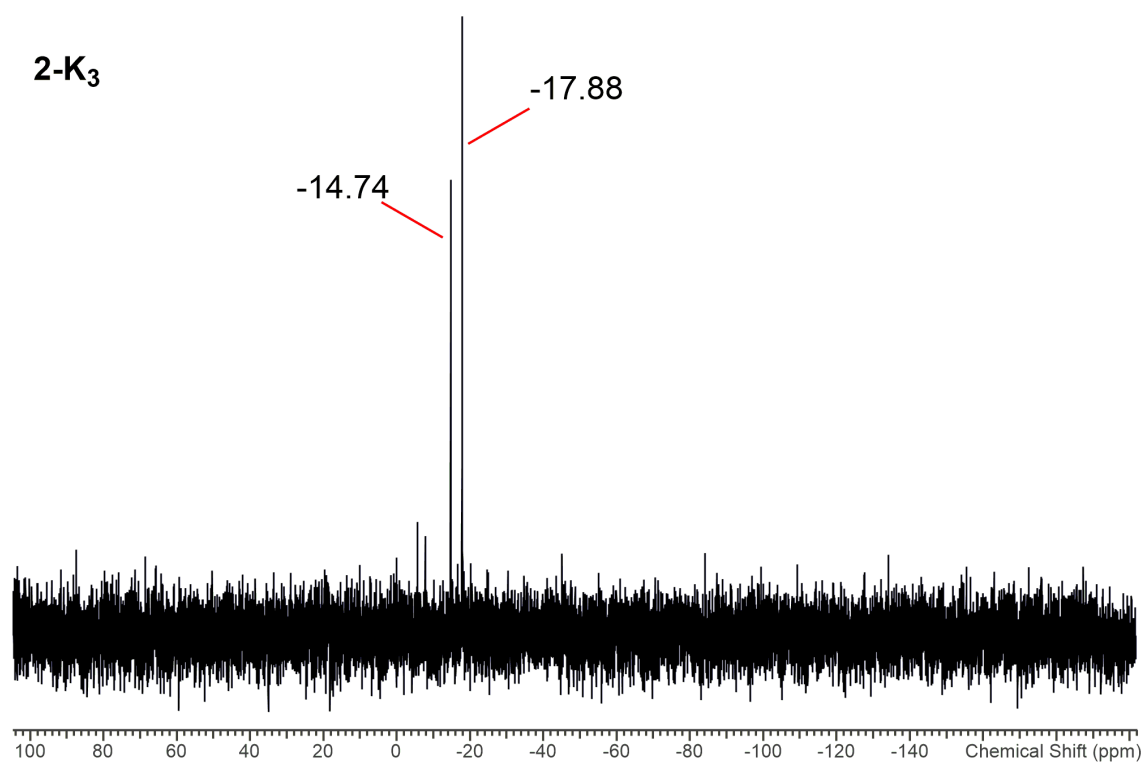

**Figure S24.**  $^{29}\text{Si}$  DEPT NMR spectrum of **2-K<sub>3</sub>** in  $\text{C}_4\text{D}_8\text{O}$ .



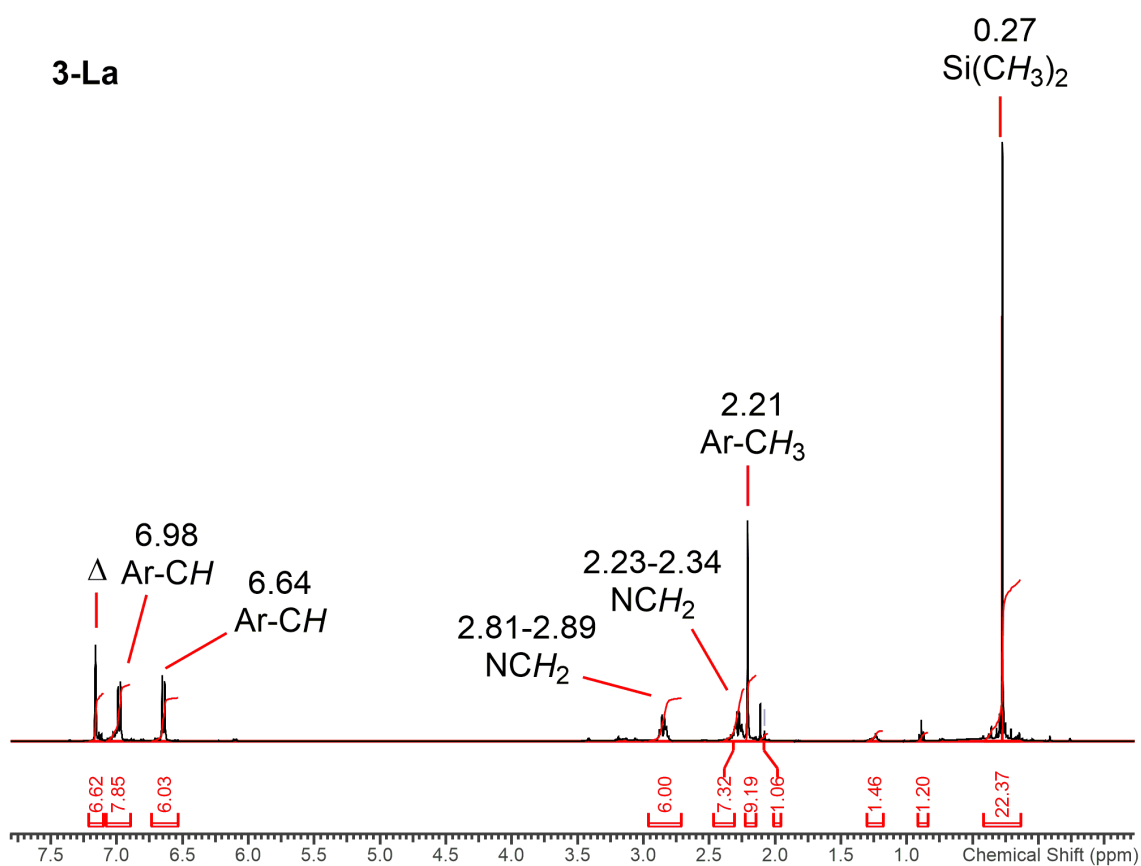

**Figure S25.**  $^1\text{H}$  NMR spectrum of **3-La** in  $\text{C}_6\text{D}_6$ .  $\Delta$  denotes  $\text{C}_6\text{H}_6$ .

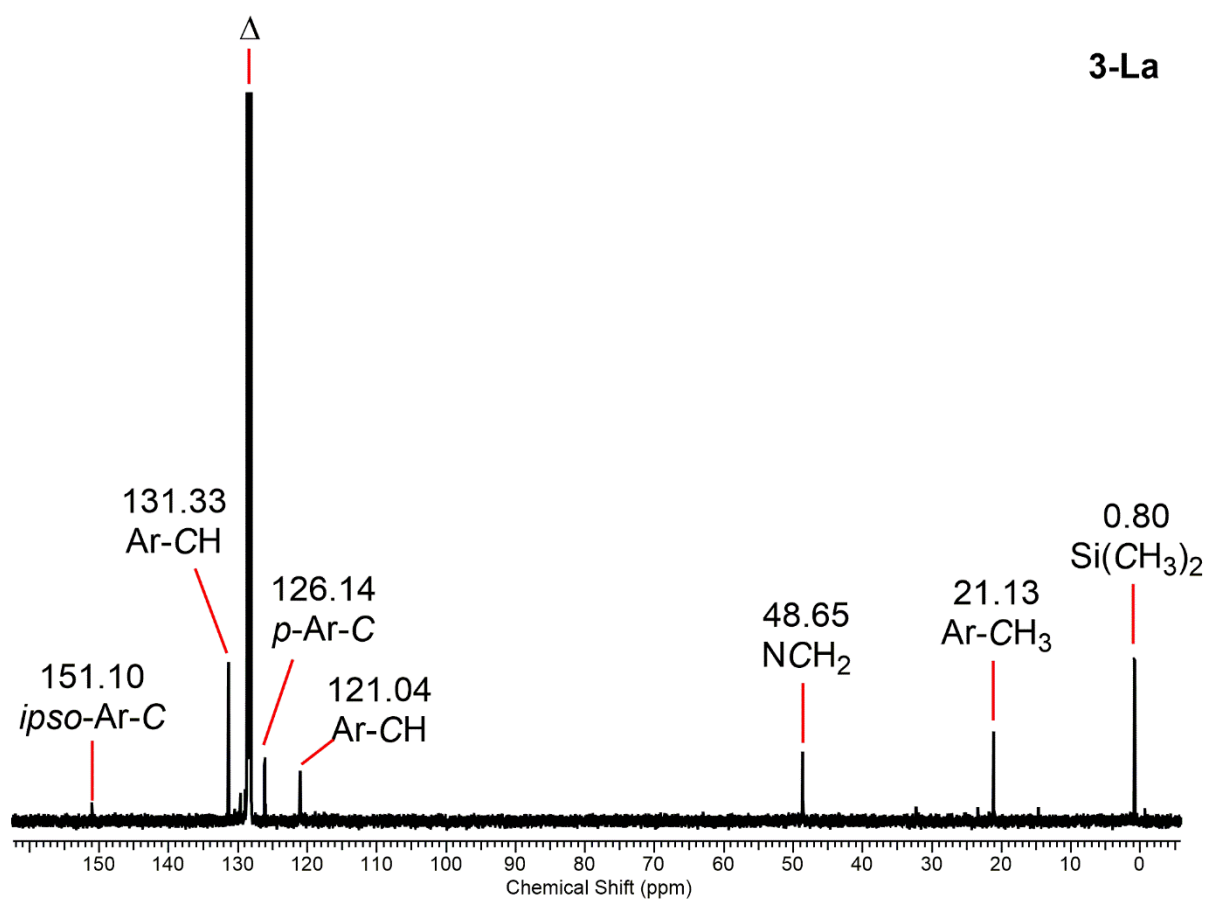

**Figure S26.**  $^{13}\text{C}\{^1\text{H}\}$  NMR spectrum of **3-La** in  $\text{C}_6\text{D}_6$ .  $\Delta$  denotes  $\text{C}_6\text{H}_6$ .

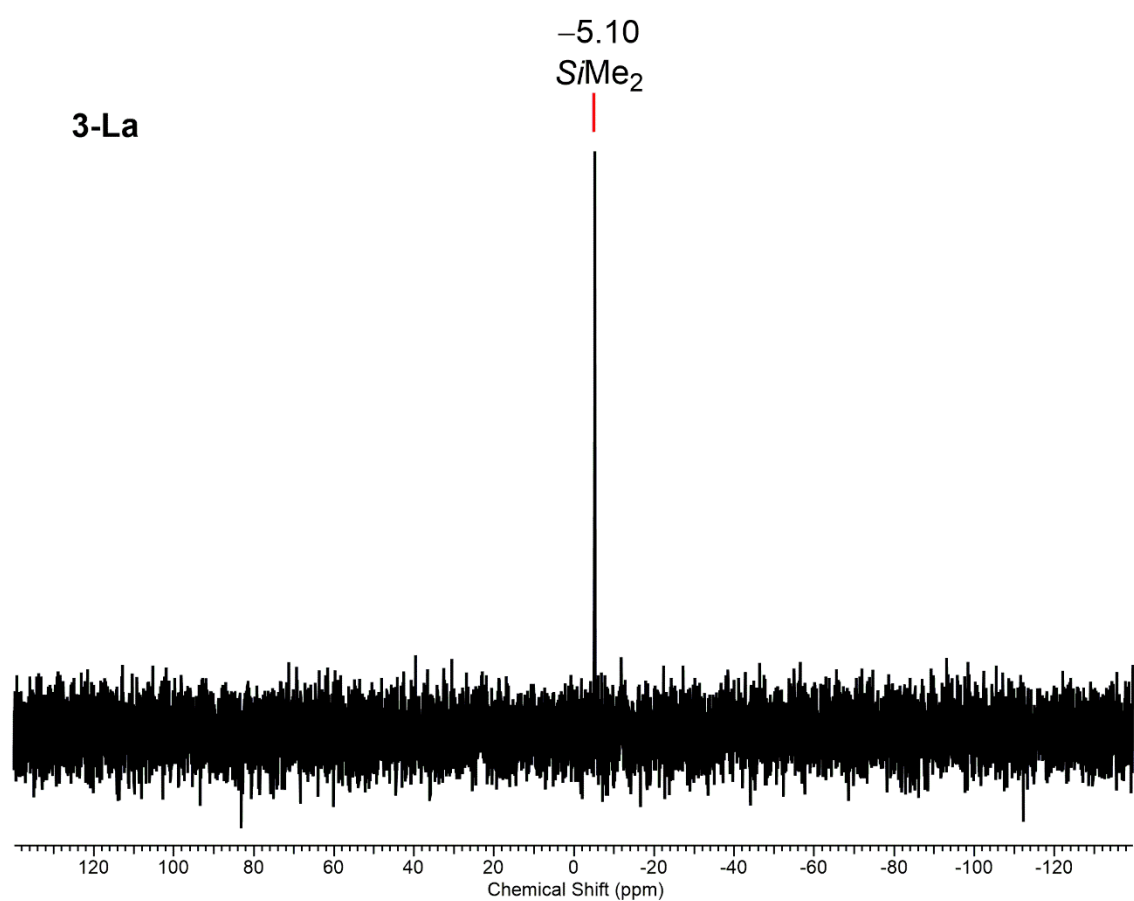

**Figure S27.**  $^{29}\text{Si}\{^1\text{H}\}$  NMR spectrum of **3-La** in  $\text{C}_6\text{D}_6$ .

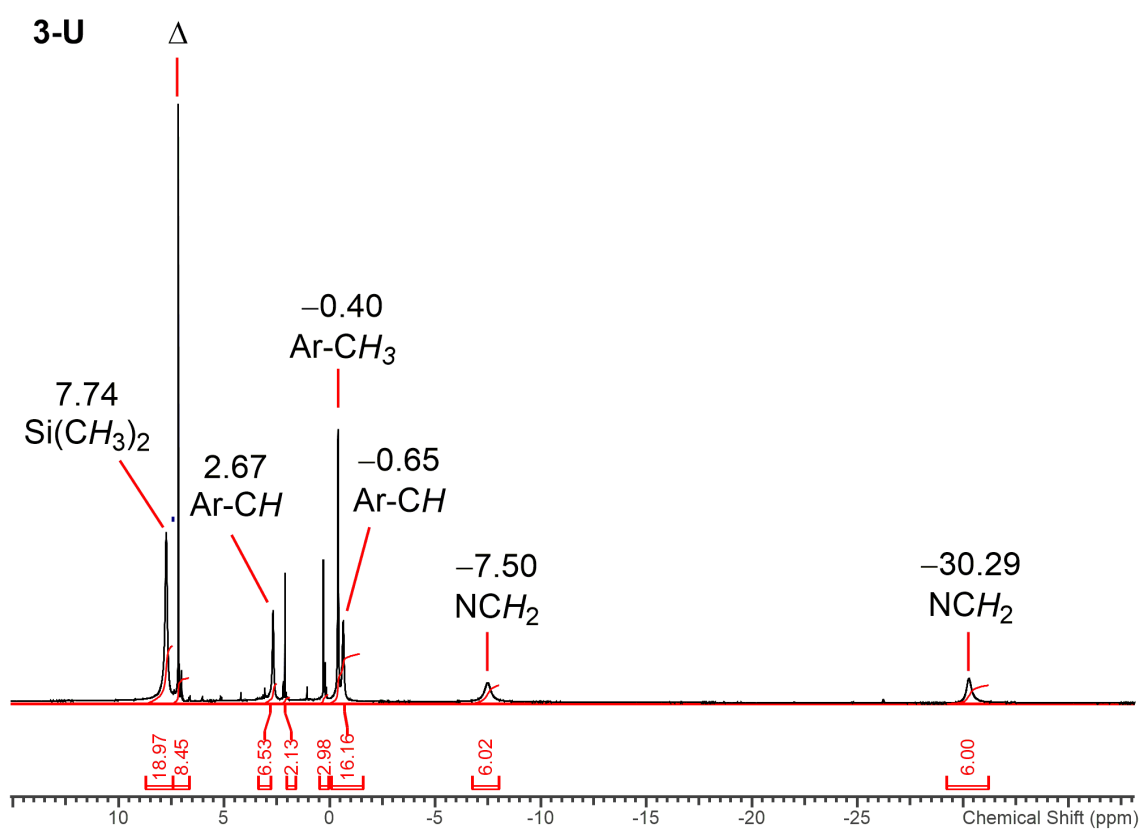

**Figure S28.**  $^1\text{H}$  NMR spectrum of **3-U** in  $\text{C}_6\text{D}_6$ .  $\Delta$  denotes  $\text{C}_6\text{H}_6$ .

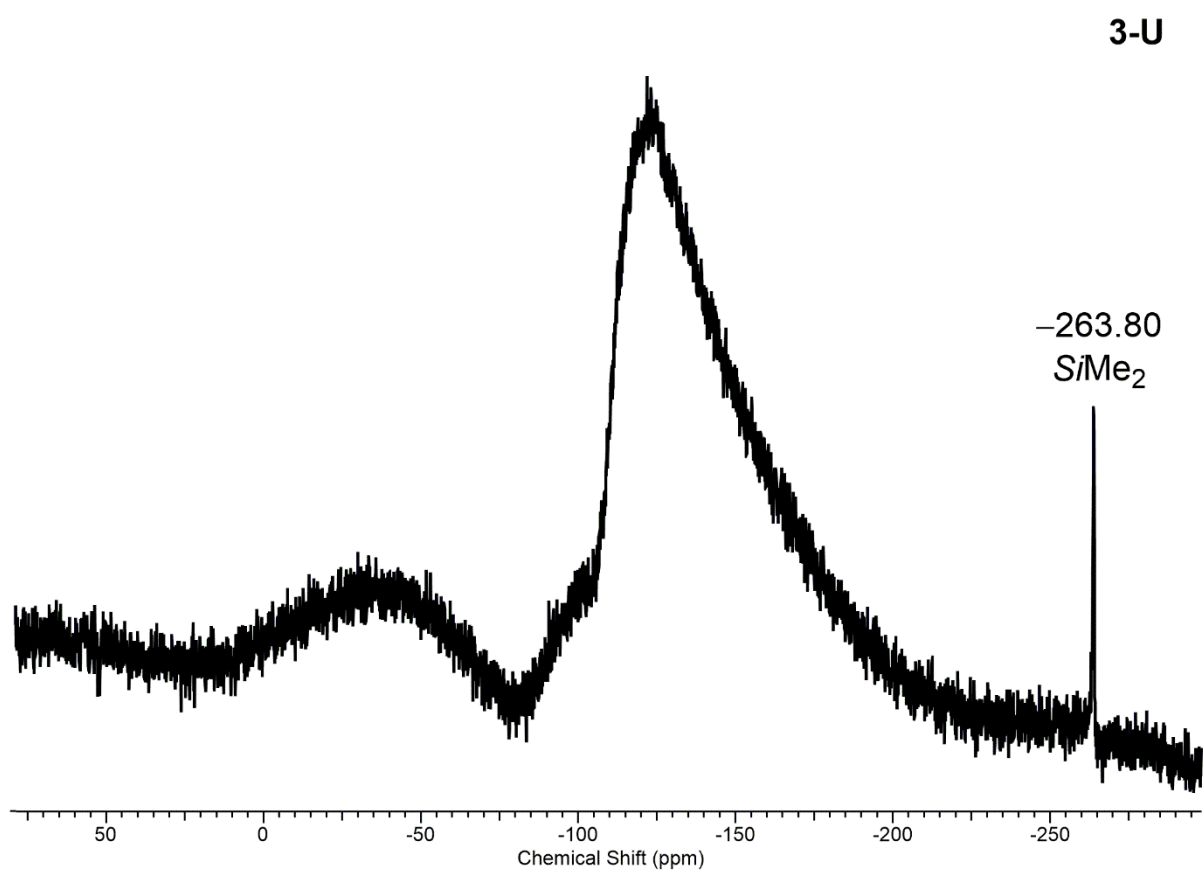

**Figure S29.**  $^{29}\text{Si}\{^1\text{H}\}$  NMR spectrum of **3-U** in  $\text{C}_6\text{D}_6$ .

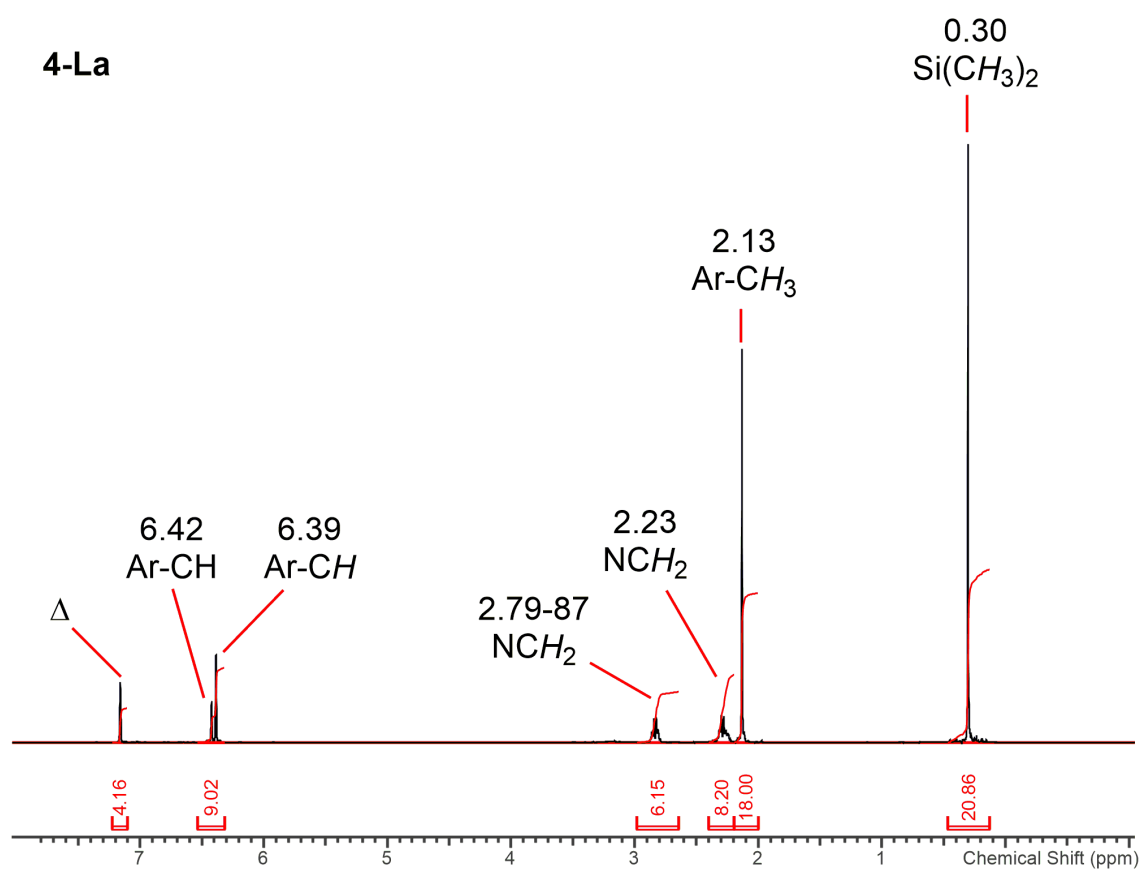

**Figure S30.**  $^1\text{H}$  NMR spectrum of **4-La** in  $\text{C}_6\text{D}_6$ .  $\Delta$  denotes  $\text{C}_6\text{H}_6$ .

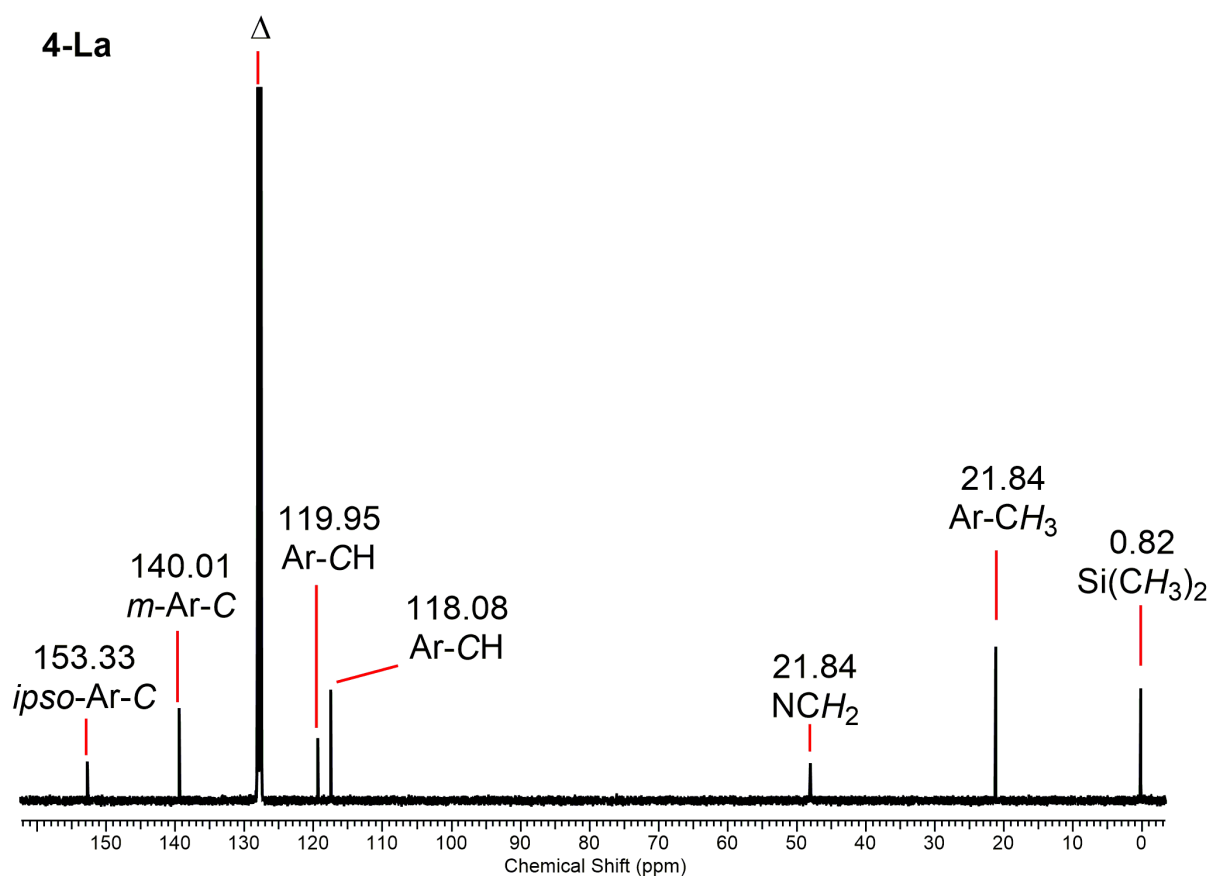

**Figure S31.**  $^{13}\text{C}\{^1\text{H}\}$  NMR spectrum of **4-La** in  $\text{C}_6\text{D}_6$ .  $\Delta$  denotes  $\text{C}_6\text{H}_6$ .

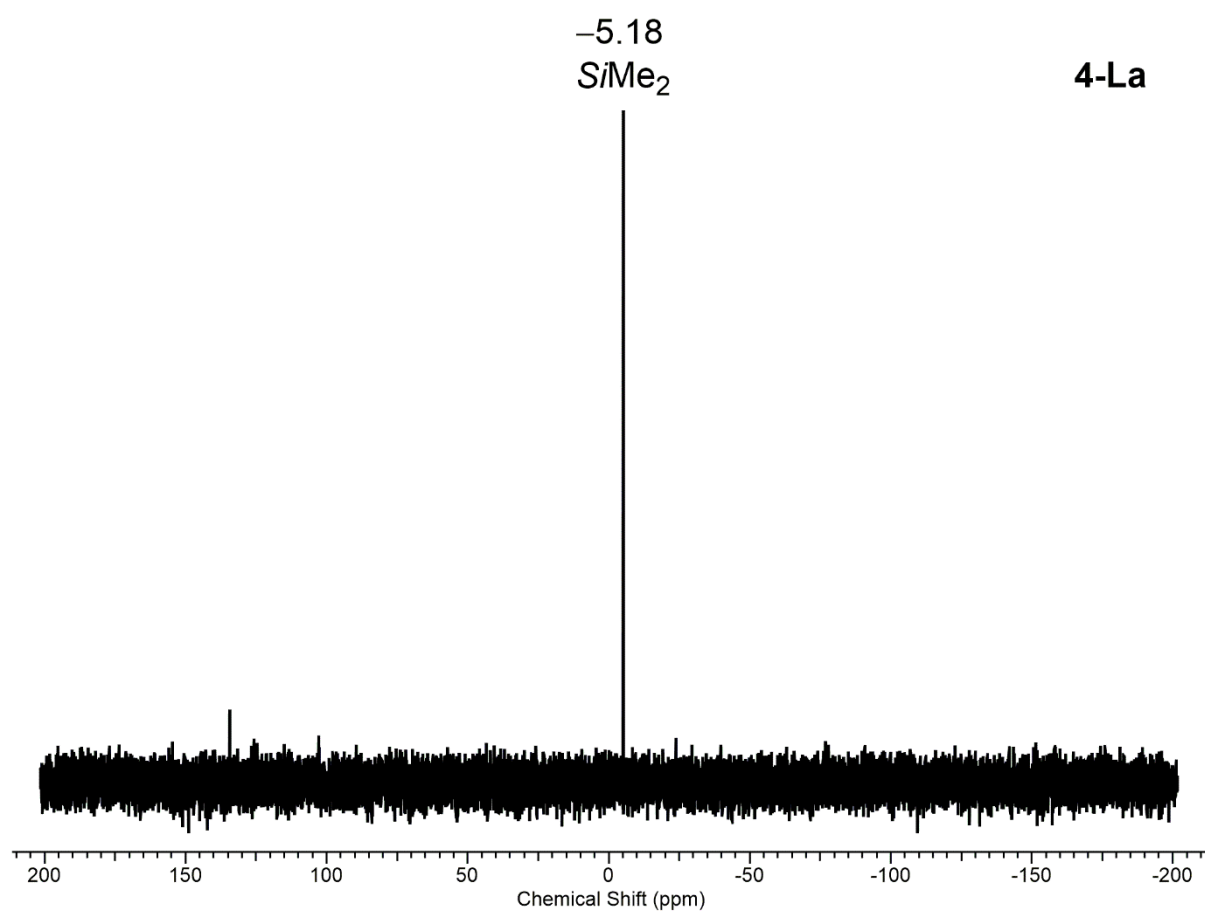

**Figure S32.**  $^{29}\text{Si}\{^1\text{H}\}$  NMR spectrum of **4-La** in  $\text{C}_6\text{D}_6$ .

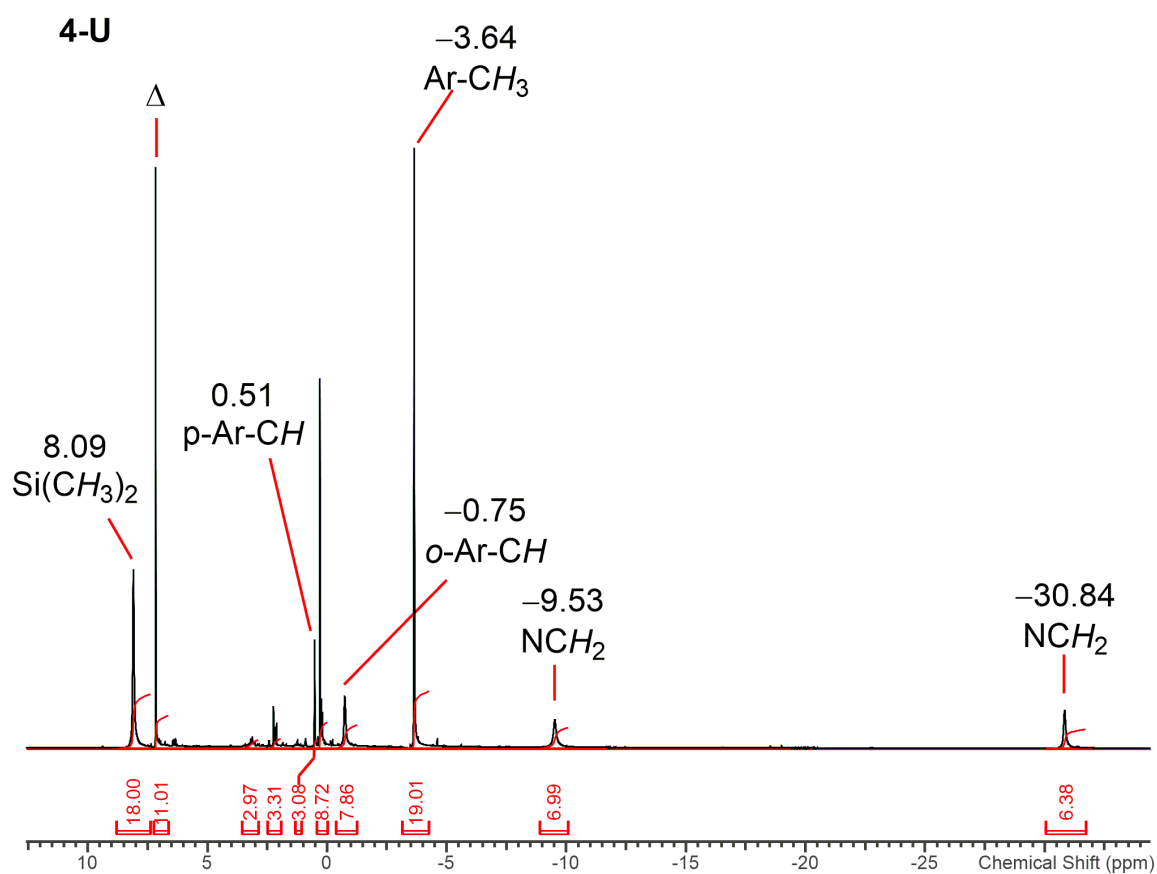

**Figure S33.**  $^1\text{H}$  NMR spectrum of **4-U** in  $\text{C}_6\text{D}_6$ .  $\Delta$  denotes  $\text{C}_6\text{H}_6$ .

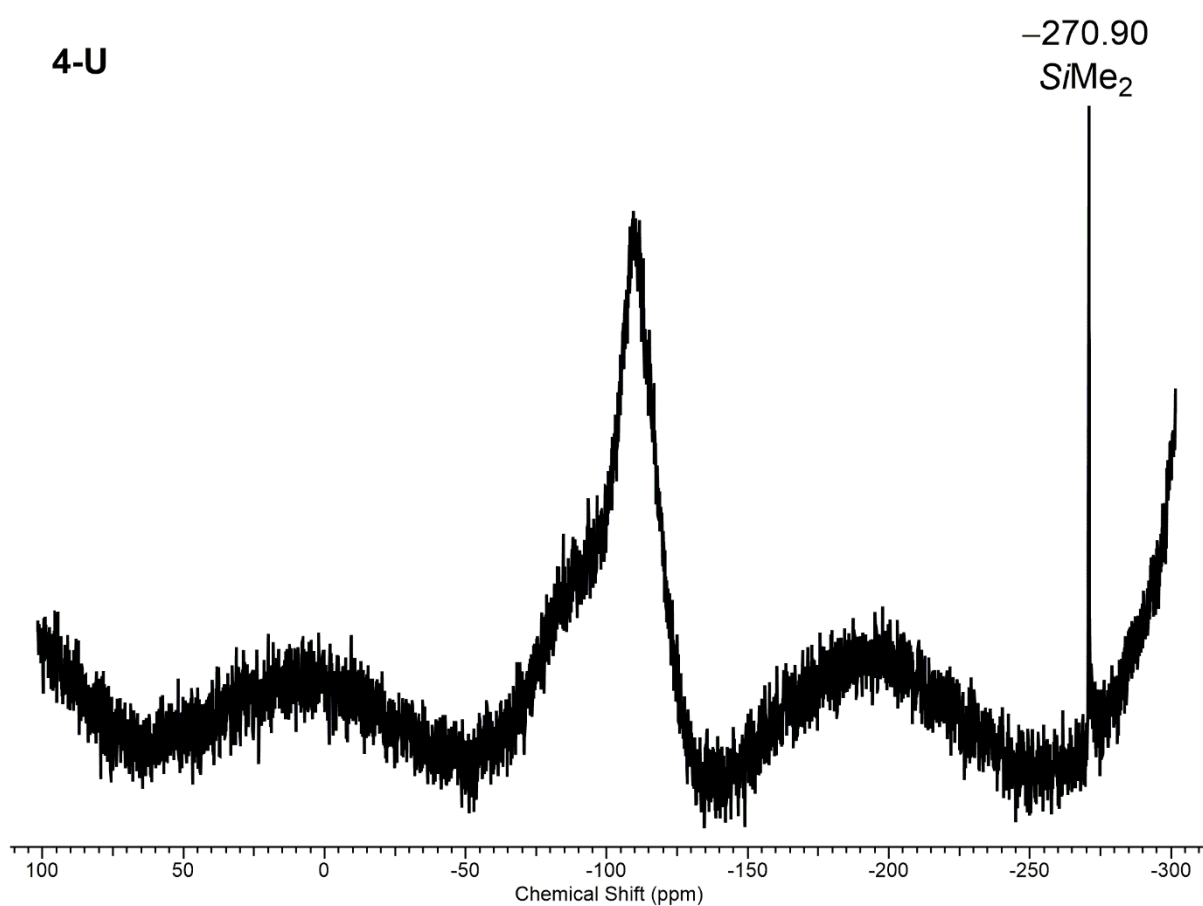

**Figure S34.**  $^{29}\text{Si}\{^1\text{H}\}$  NMR spectrum of **4-U** in  $\text{C}_6\text{D}_6$ .

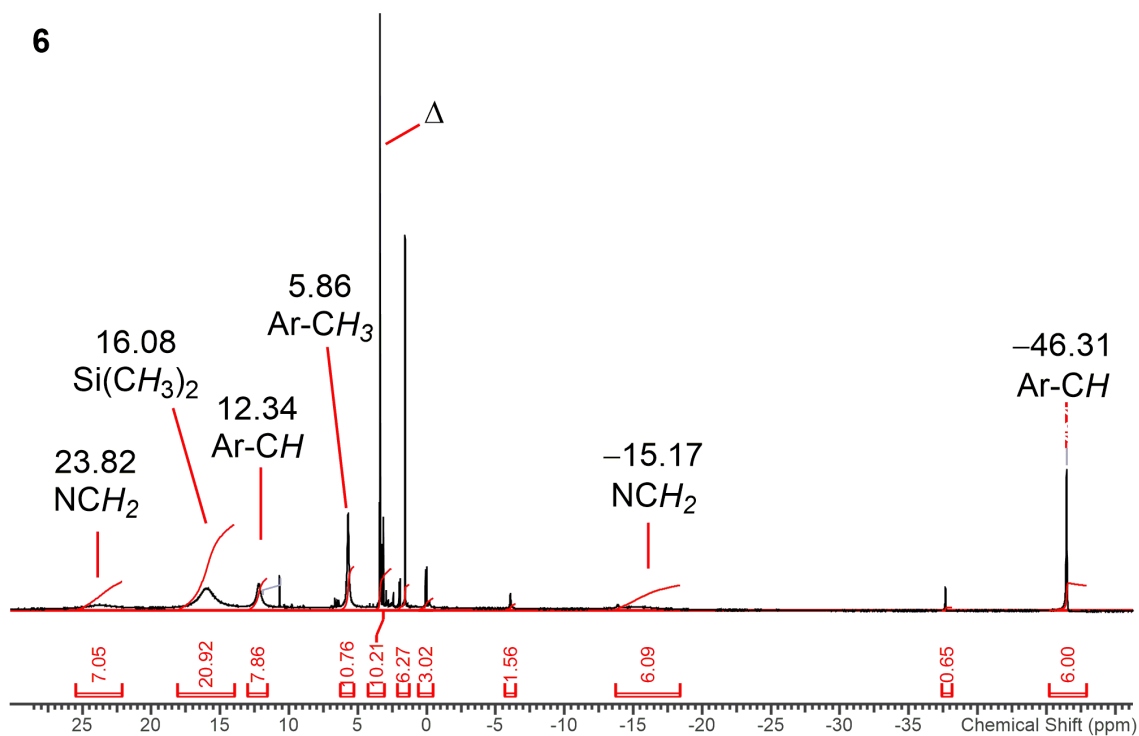

**Figure S35.** <sup>1</sup>H NMR spectrum of **6** in C<sub>4</sub>D<sub>8</sub>O, prepared by Method 1. Δ denotes C<sub>4</sub>D<sub>8</sub>O.

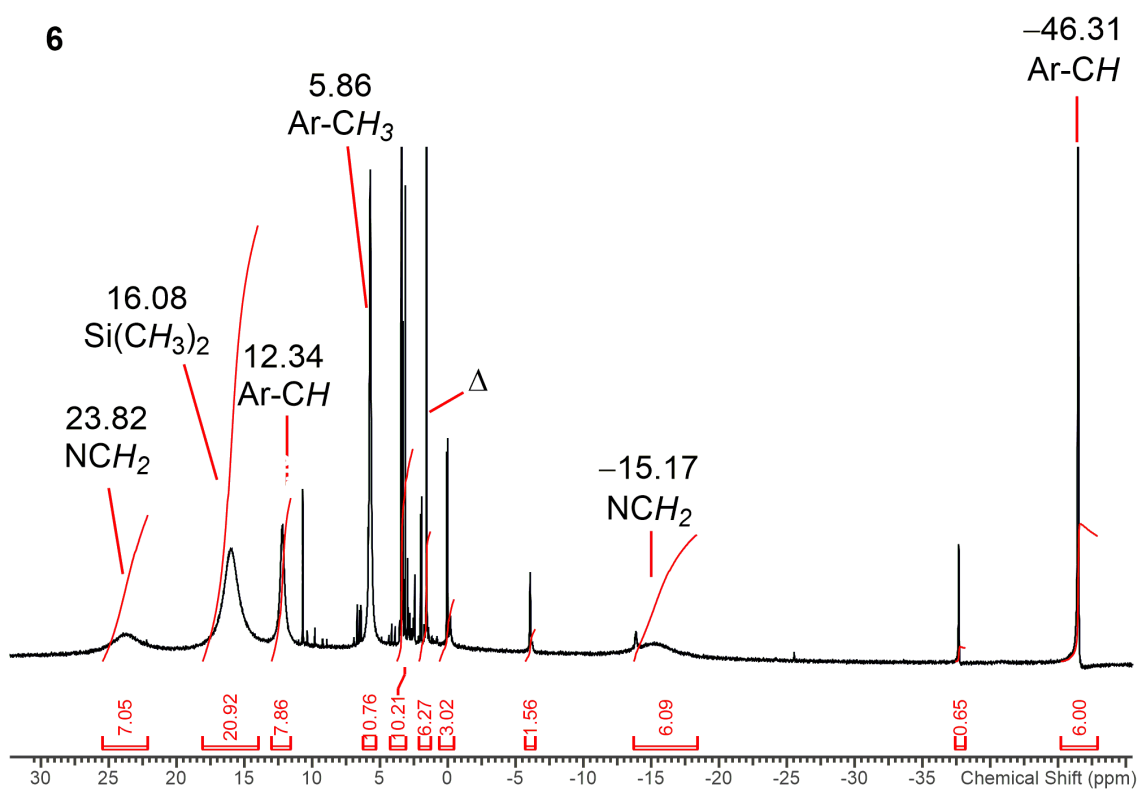

**Figure S36.** <sup>1</sup>H NMR spectrum of **6** in C<sub>4</sub>D<sub>8</sub>O, prepared by Method 1, zoomed in to show signals that are paramagnetically broadened into the baseline. Δ denotes C<sub>4</sub>D<sub>8</sub>O.

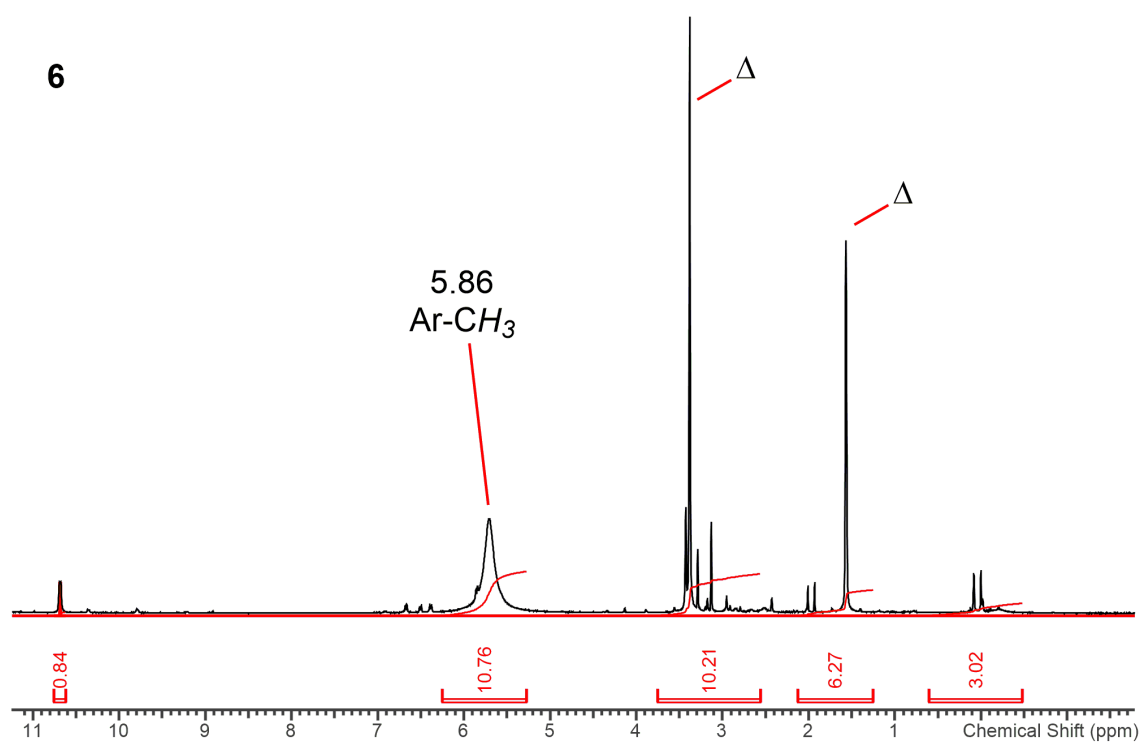

**Figure S37.** <sup>1</sup>H NMR spectrum of **6** in C<sub>4</sub>D<sub>8</sub>O, prepared by Method 1, zoomed in to show signals in the diamagnetic region. Δ denotes C<sub>4</sub>D<sub>8</sub>O.

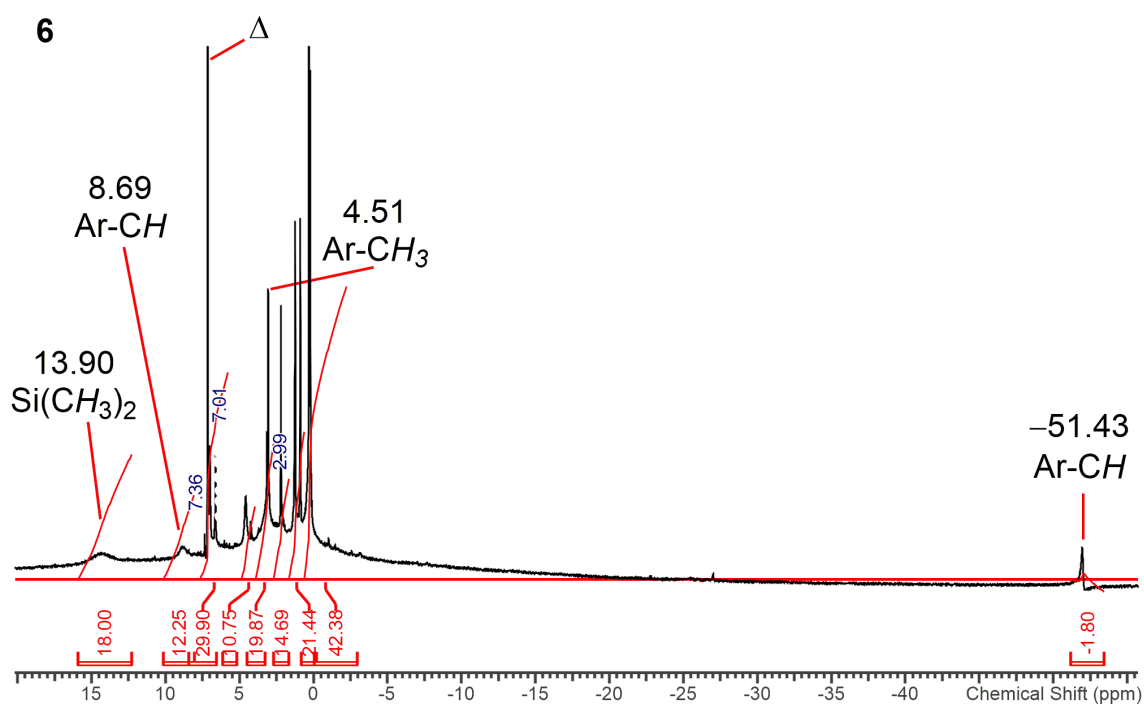

**Figure S38.** <sup>1</sup>H NMR spectrum of **6** in C<sub>6</sub>D<sub>6</sub>, prepared by Method 1. Δ denotes C<sub>6</sub>H<sub>6</sub>. Note that there are minor chemical shifts compared to the <sup>1</sup>H NMR spectra collected in C<sub>4</sub>D<sub>8</sub>O shown above, with the deshielded NCH<sub>2</sub> resonance not visible in C<sub>6</sub>D<sub>6</sub>.

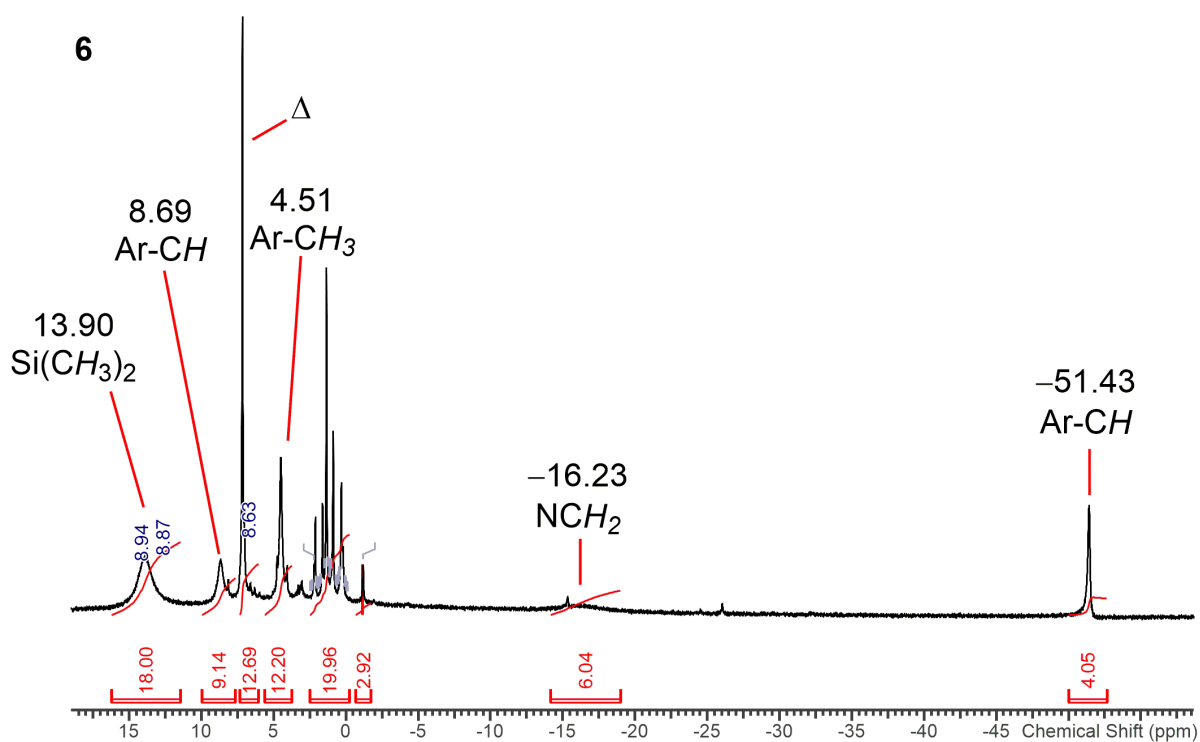

**Figure S39.** <sup>1</sup>H NMR spectrum of **6** in C<sub>6</sub>D<sub>6</sub>, prepared by Method 2. Δ denotes C<sub>6</sub>H<sub>6</sub>. Note that there are differences in the amount of diamagnetic impurities between Method 1 and Method 2, and unlike the spectrum above the shielded NCH<sub>2</sub> resonance is visible.

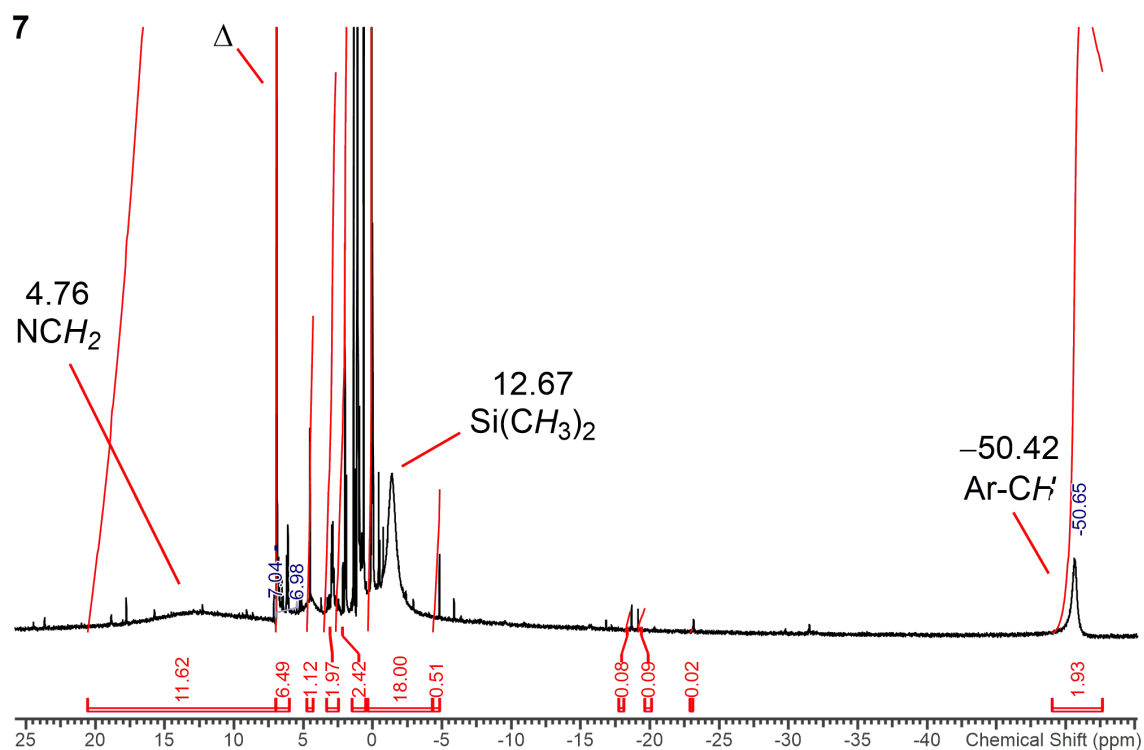

**Figure S40.** <sup>1</sup>H NMR spectrum of **7** in C<sub>6</sub>D<sub>6</sub>, prepared by Method 1. Δ denotes C<sub>6</sub>H<sub>6</sub>.



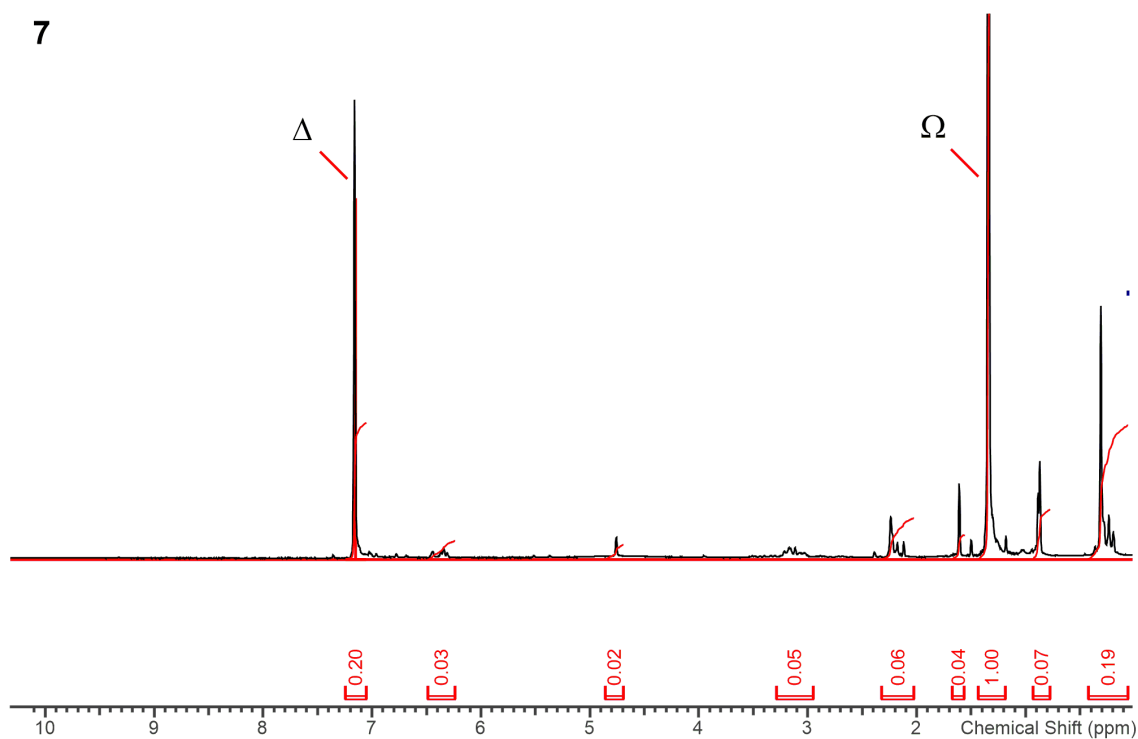

**Figure S41.**  $^1\text{H}$  NMR spectrum of **7** in  $\text{C}_6\text{D}_6$ , prepared by Method 1, zoomed in to show signals in the diamagnetic region.  $\Delta$  denotes  $\text{C}_6\text{H}_6$ ,  $\Omega$  denotes silicon grease.

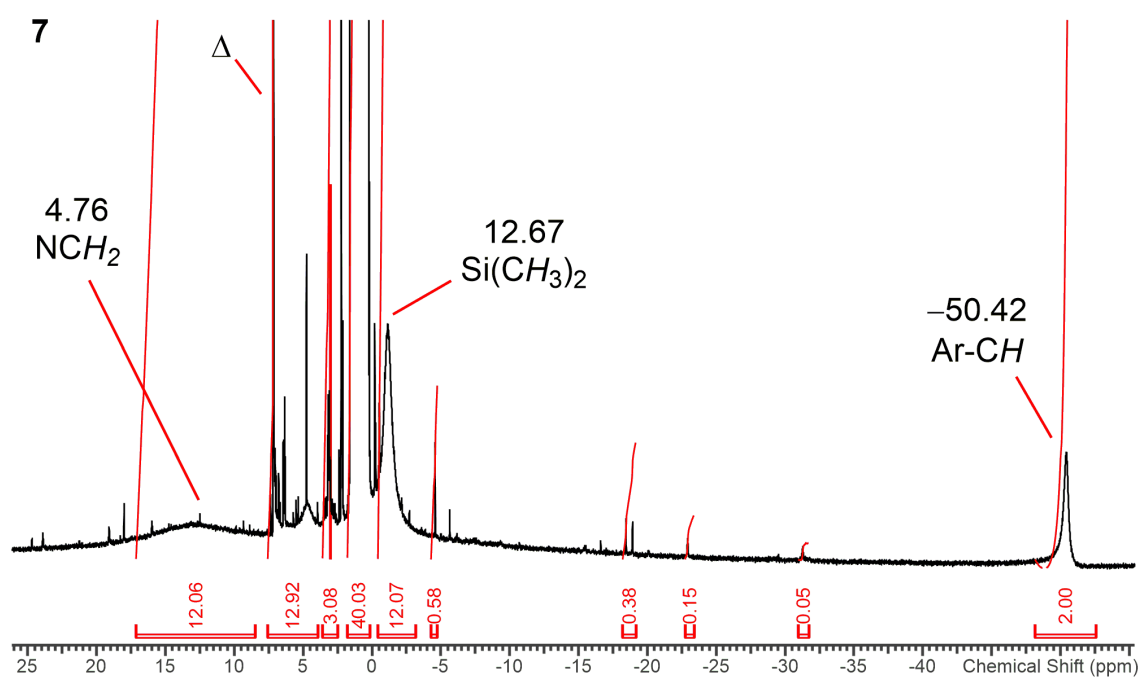

**Figure S42.**  $^1\text{H}$  NMR spectrum of **7** in  $\text{C}_6\text{D}_6$ , prepared by Method 2.  $\Delta$  denotes  $\text{C}_6\text{H}_6$ . Note that there are differences in the amount of diamagnetic impurities between Method 1 and Method 2.
